# Supplementary material for: Transcriptomic analyses of gastrulation-stage mouse embryos with differential susceptibility to alcohol
Source: Oxford University Press journal article supplement (doi:10.1242/dmm.049012), 2021-05-27
Supplement: dmm049012supp.pdf [file dmm049012supp.pdf]

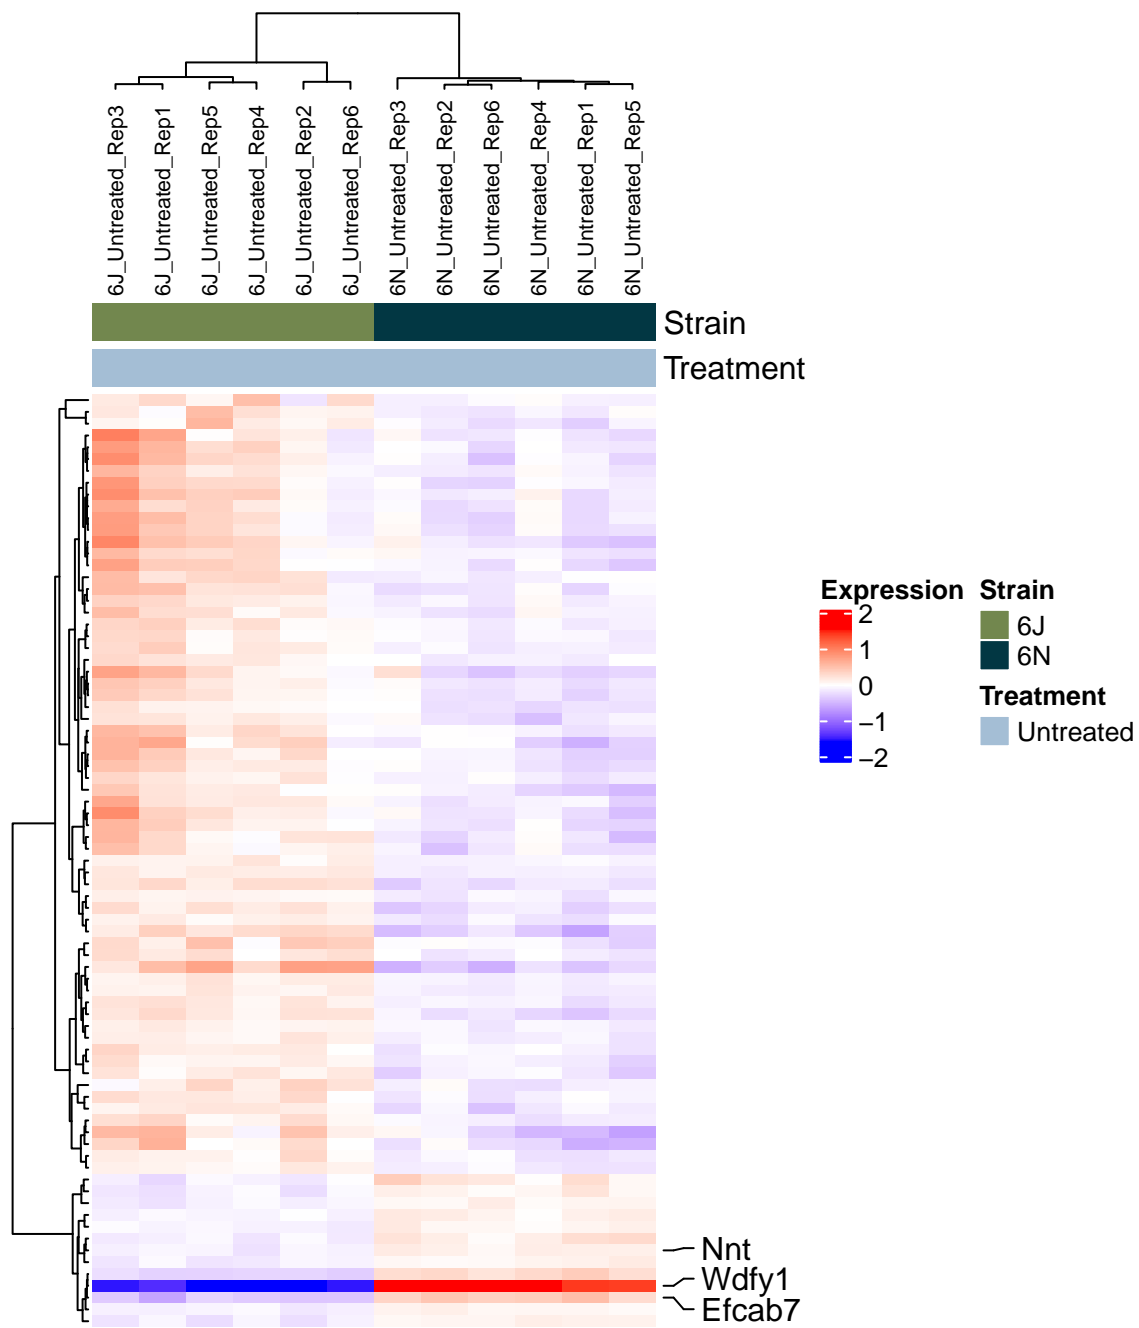

**Fig. S1. Median-centered VST-normalized expression values for all differentially expressed genes for each replicate in the E7.0 baseline analysis.** n = 6 replicates/group. Gene expression was median centered and clustered hierarchically using 1-Pearson correlation distance. Red = higher median-centered expression, blue = lower median-centered expression.

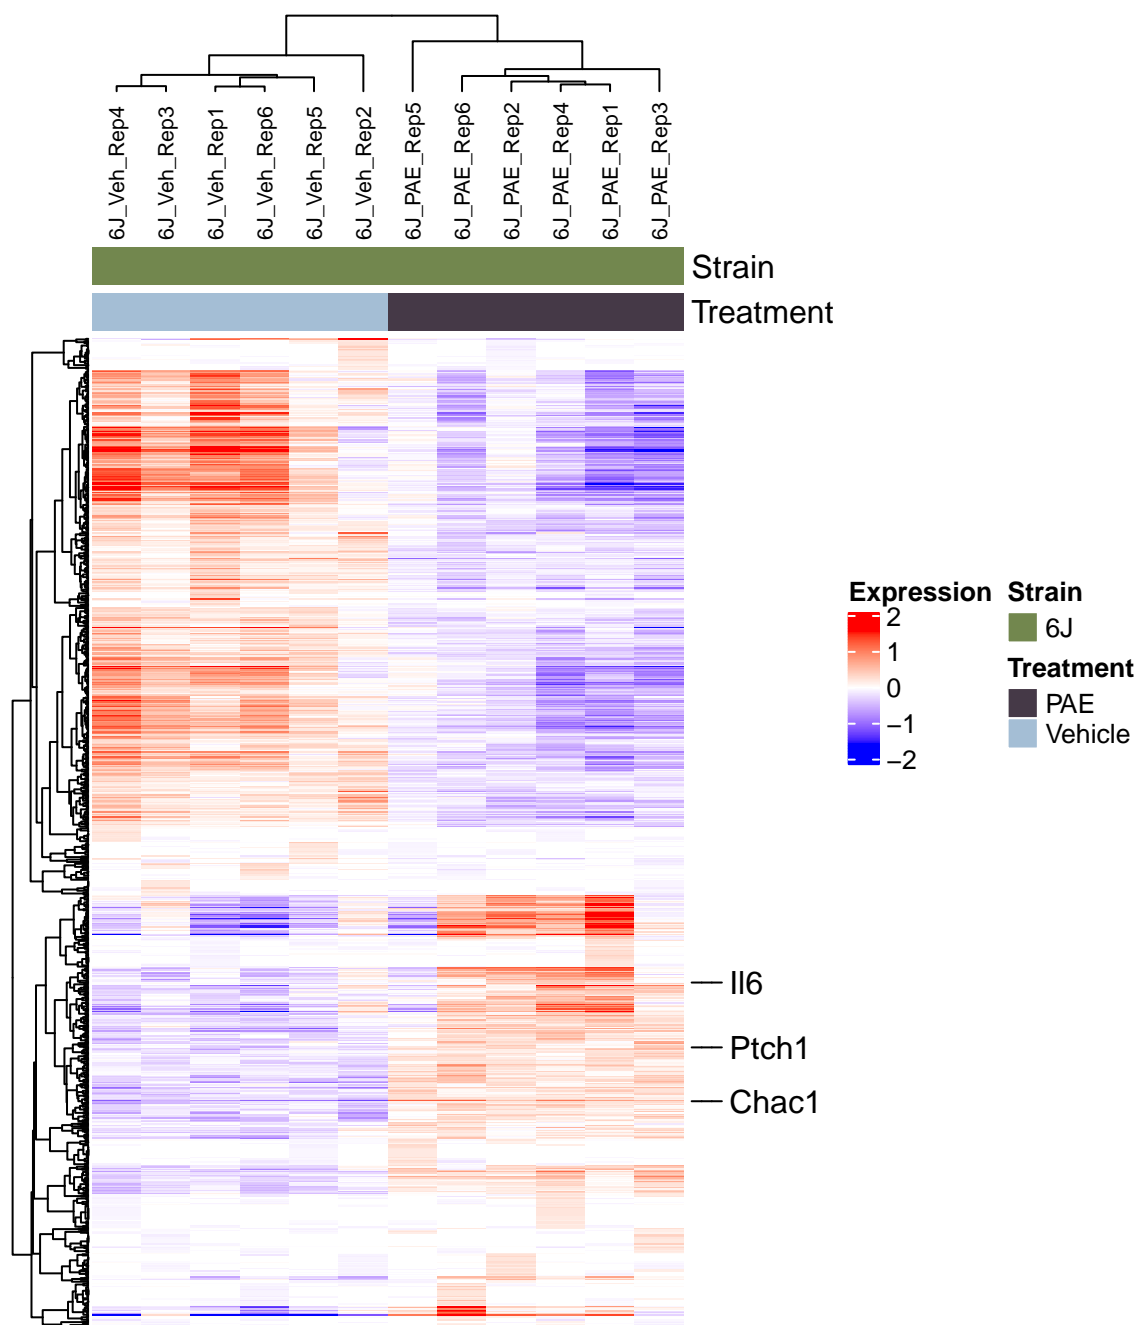

**Fig. S2. Median-centered VST-normalized expression values for all differentially expressed genes for each replicate in the vehicle-treated 6N and 6J analyses at E7.25.** Significant genes from the E7.25 time point.  $n = 6$  replicates/group. Gene expression was median centered and clustered hierarchically using 1-Pearson correlation distance. Red = higher median-centered expression, blue = lower median-centered expression.

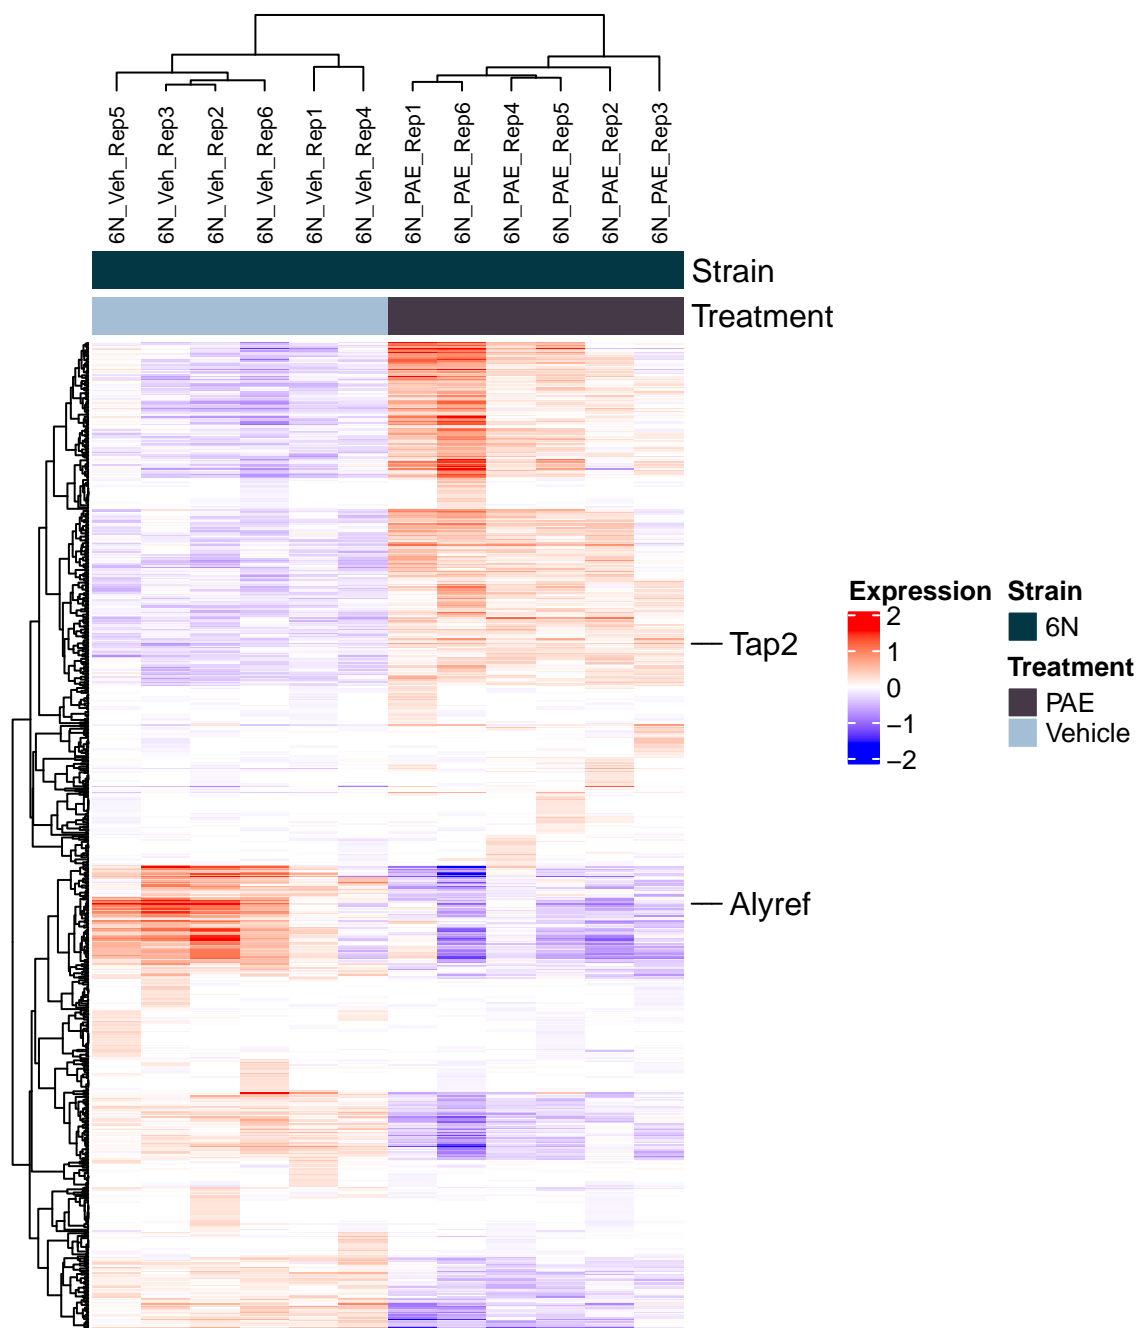

**Fig. S3. Median-centered VST-normalized expression values for all differentially expressed genes for each replicate in the vehicle-treated 6N and 6J analyses at E7.5.** Significant genes from the E7.5 time point. n = 6 replicates in the 6N group, 5 replicates for the 6J group. Gene expression was median centered and clustered hierarchically using 1-Pearson correlation distance. Red = higher median-centered expression, blue = lower median-centered expression.

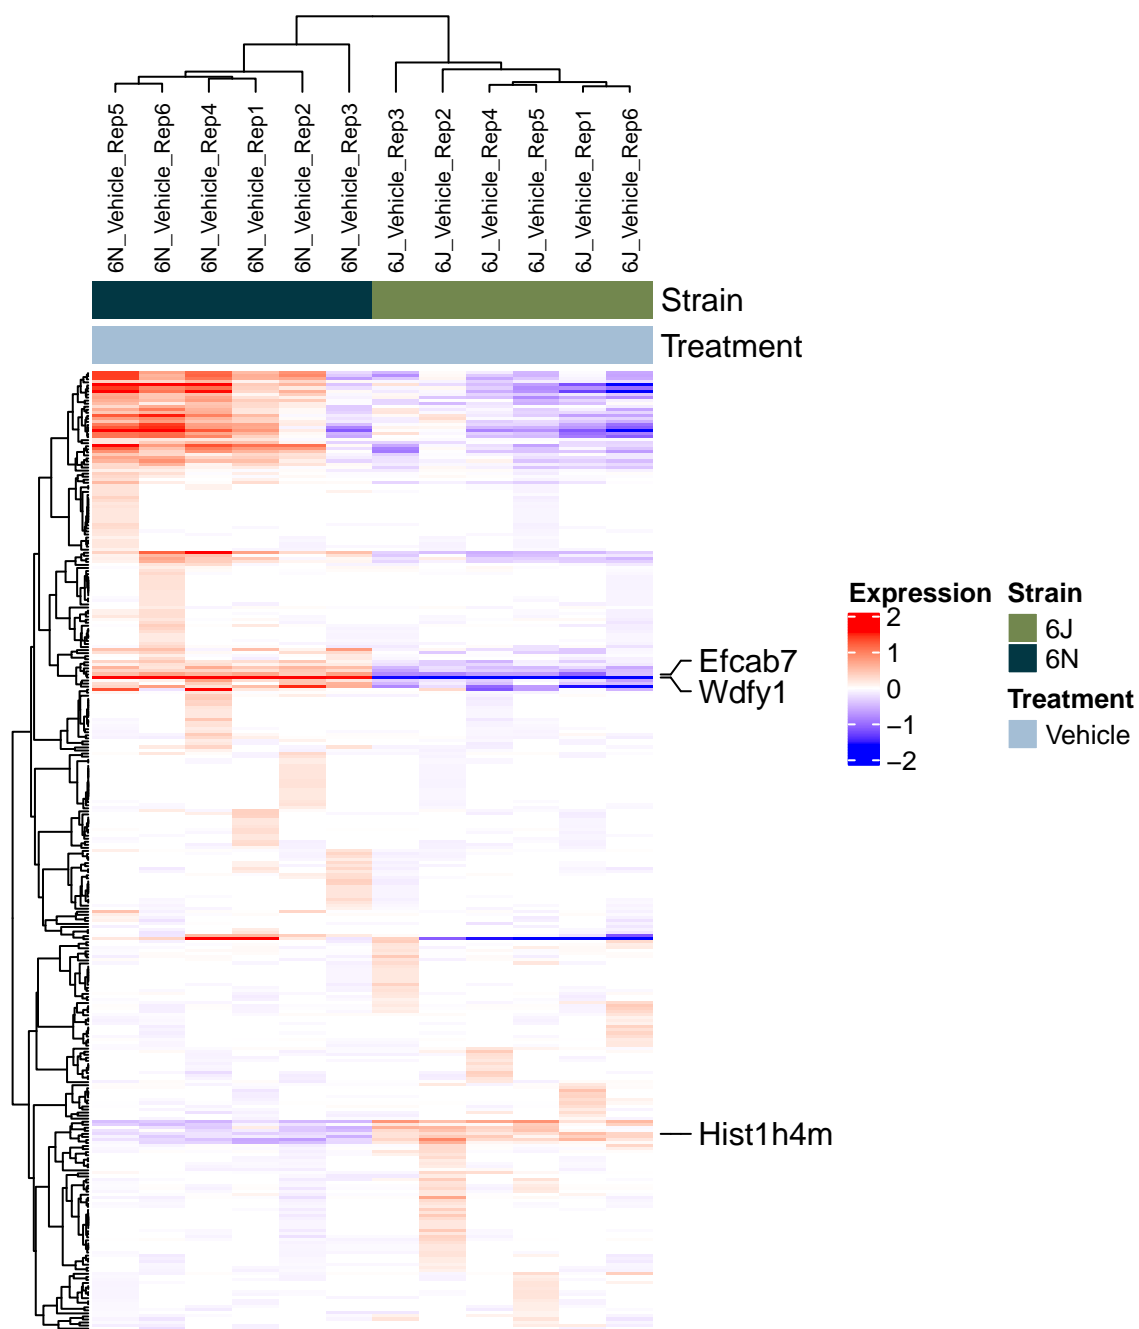

**Fig. S4. Median-centered VST-normalized expression values for all differentially expressed genes for each replicate in PAE vs. Vehicle-treated 6J's at the E7.25 time point.** Significant genes from PAE vs. vehicle-treated 6J's. n = 6 replicates/group. Gene expression was median centered and clustered hierarchically using 1-Pearson correlation distance. Red = higher median-centered expression, blue = lower median-centered expression.

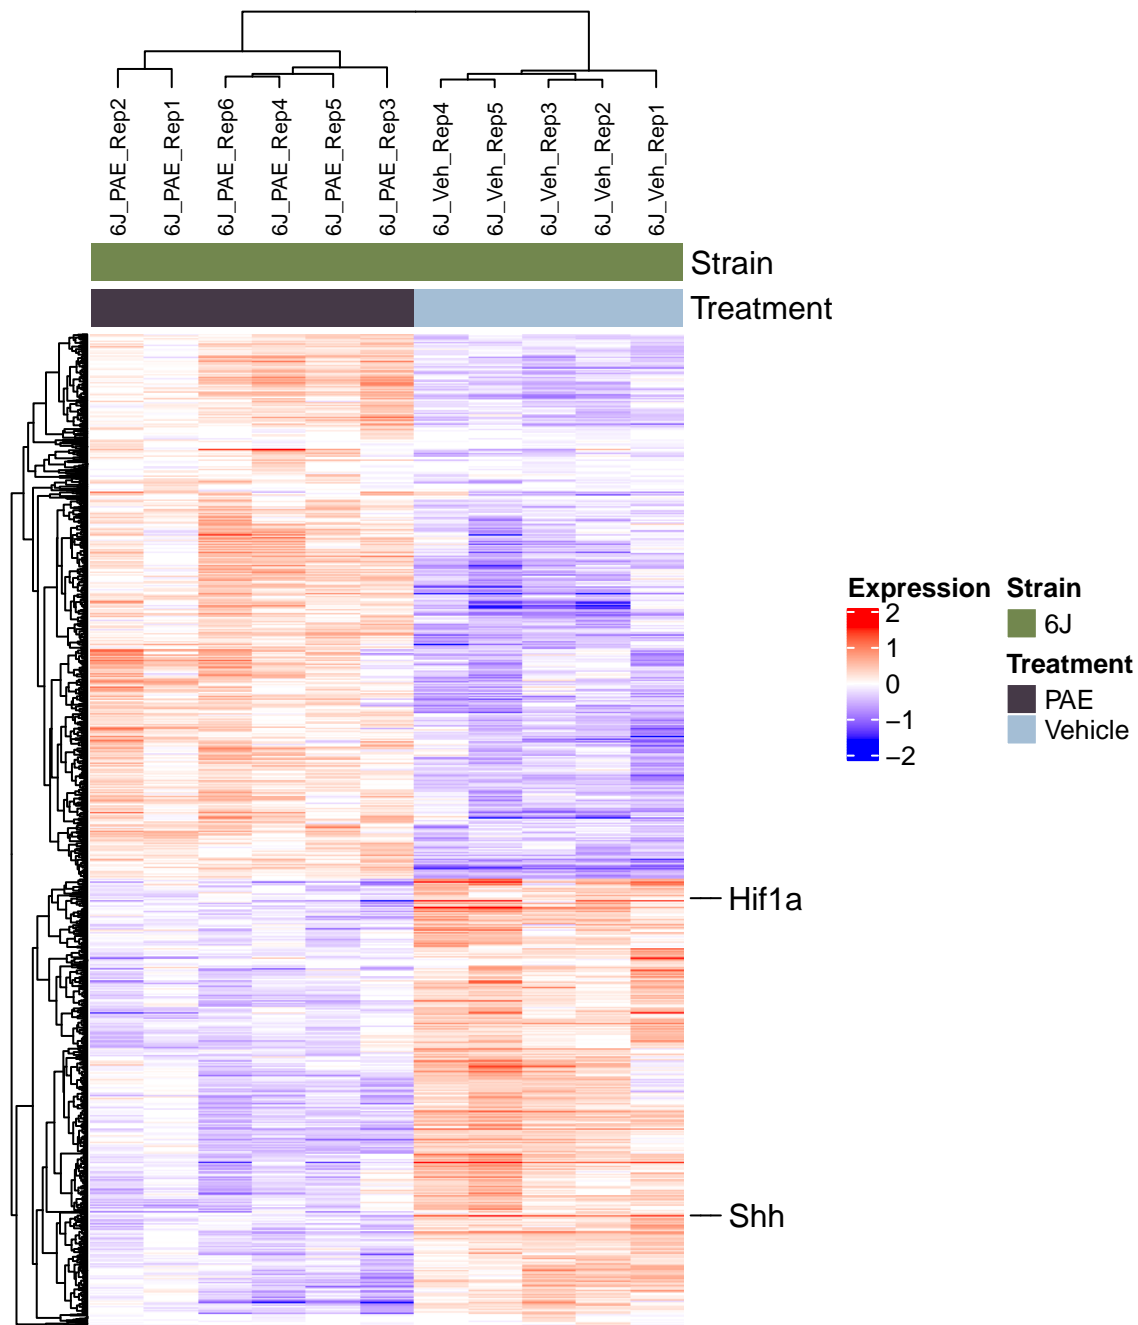

**Fig. S5. Median-centered VST-normalized expression values for all differentially expressed genes for each replicate in PAE vs. Vehicle-treated 6N's at the E7.25 time point.** A) Significant genes from PAE vs. vehicle-treated 6N's. n = 6 replicates/group. Gene expression was median centered and clustered hierarchically using 1-Pearson correlation distance. Red = higher median-centered expression, blue = lower median-centered expression.

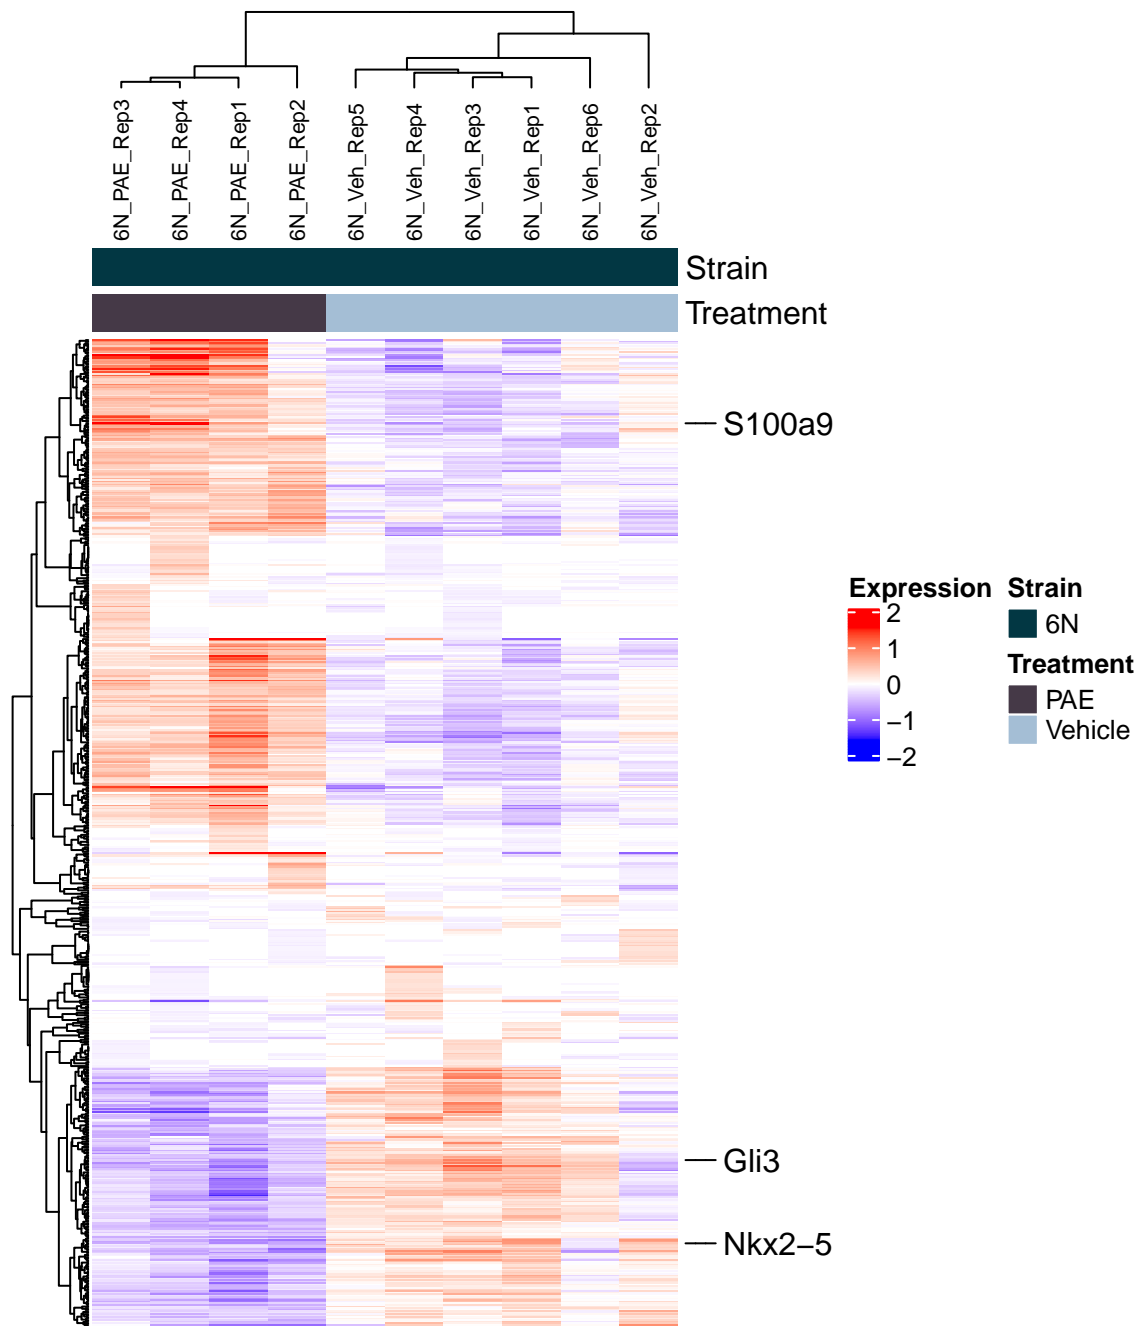

**Fig. S6. Median-centered VST-normalized expression values for all differentially expressed genes for each replicate in PAE vs. Vehicle-treated 6J's at the E7.5 time point.** Significant genes from PAE vs. vehicle-treated 6J's. n = 5 replicates for the vehicle-treated group, 6 replicates for the PAE group. Genes and samples were hierarchically clustered by 1-Pearson correlation distance. Red = higher median-centered expression, blue = lower median-centered expression.

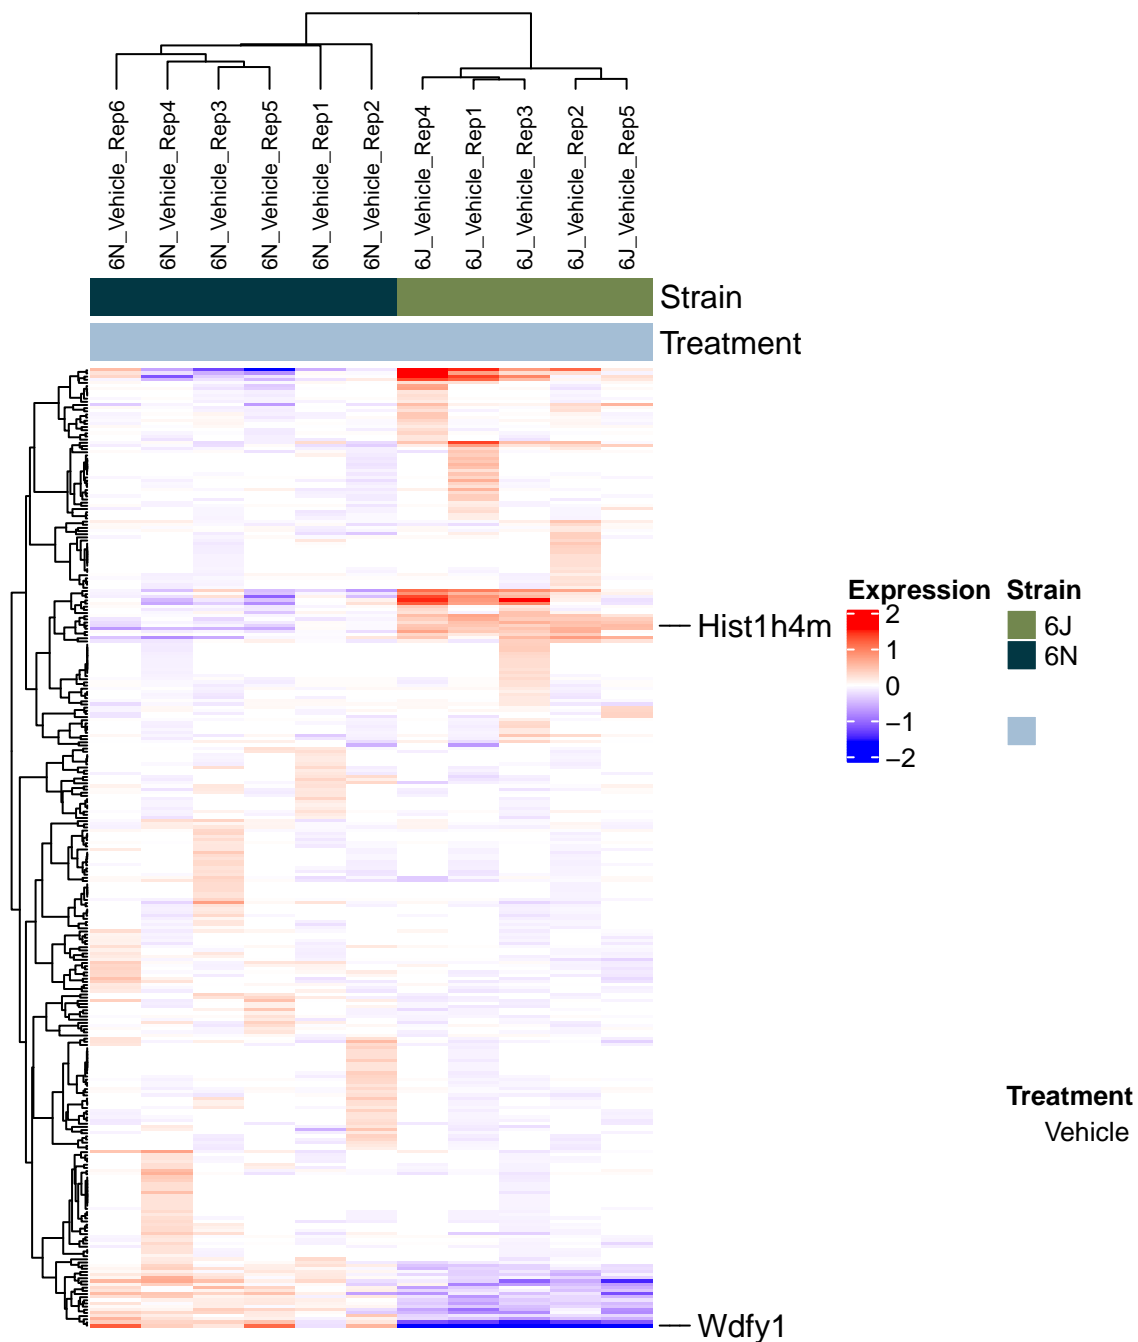

**Fig. S7. Median-centered VST-normalized expression values for all differentially expressed genes for each replicate in PAE vs. Vehicle-treated 6N's at the E7.5 time point.** Significant genes from PAE vs. vehicle-treated 6N's. n = 6 replicates in the 6N group, 4 replicates for the 6J group. Genes and samples were hierarchically clustered by 1-Pearson correlation distance. Red = higher median-centered expression, blue = lower median-centered expression.

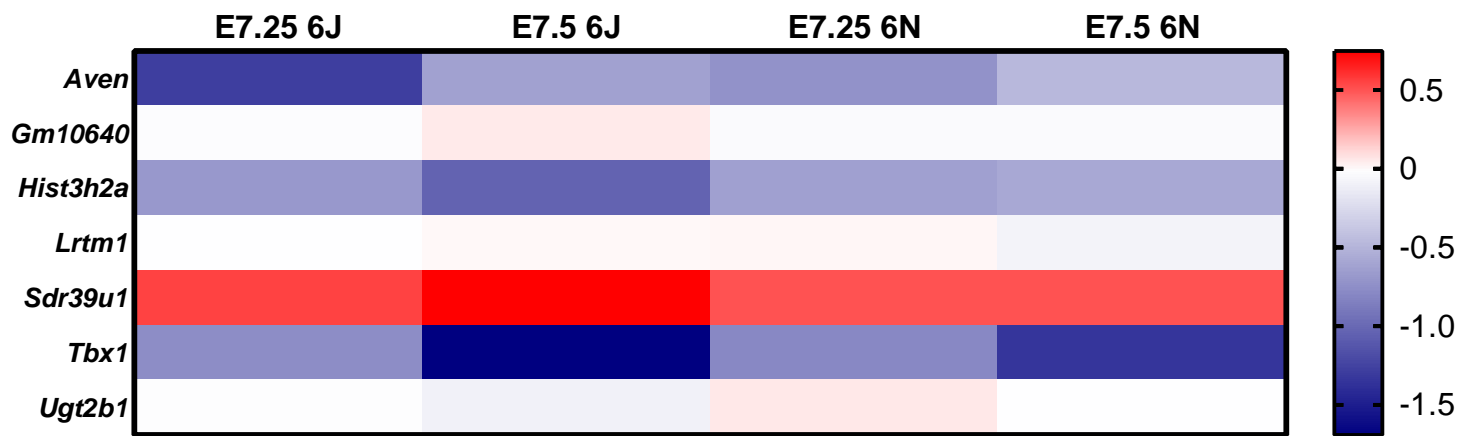

**Fig. S8. Seven genes differentially regulated by PAE in both strains at both time points.** Data are shown as the Log<sub>2</sub>FC for each PAE group vs. the appropriate vehicle-treated group from that strain and time point. Red = up-regulated genes, blue = downregulated genes.

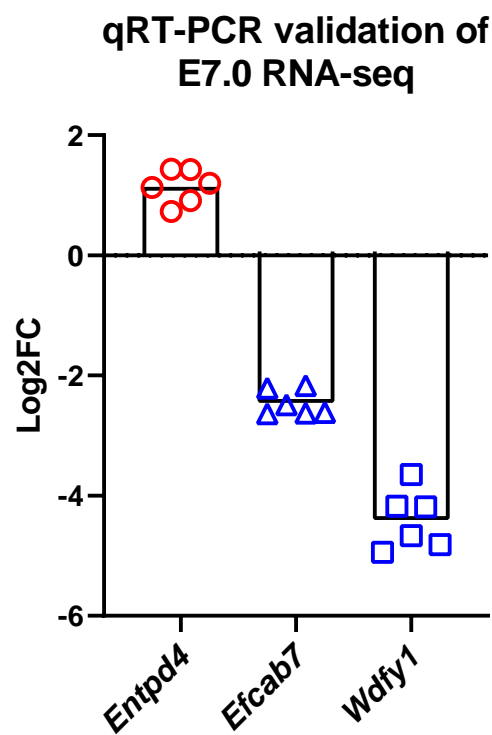

**Fig. S9. Validation of three differentially expressed genes at the E7.0 time point.** qRT-PCR was performed on different samples than those used for RNA-seq (n = 6/strain) to assess expression of *Entpd4*, *Efcab7*, and *Wdfy1*. All genes were expressed at significantly different levels in the 6J vs. 6N in the direction expected based on the RNA-seq output: *Entpd4*: +1.14 Log<sub>2</sub>FC in 6J vs. 6N,  $t(10) = 4.473$ ,  $p = 0.0012$ ; *Efcab7*: -2.46 Log<sub>2</sub>FC in 6J vs. 6N,  $t(10) = 14.36$ ,  $p < 0.0001$ ; *Wdfy1*: -4.41 Log<sub>2</sub>FC in 6J vs. 6N,  $t(10) = 20.05$ ,  $p < 0.0001$ . Error bars indicate standard error of the mean.



**Table S1.** Selected gProfiler results from differentially regulated genes between the 6J and 6N strain at baseline (E7.0). Pathways associated with down-and up-regulated genes are listed separately.**Up-regulated Genes****Gene Ontology: Biological Process**

| Term name                           | Term ID    | # of genes | Log10 p-value |
|-------------------------------------|------------|------------|---------------|
| Myeloid leukocyte migration         | GO:0097529 | 8          | 3.68          |
| Cytokine production                 | GO:0001816 | 12         | 2.71          |
| Defense response                    | GO:0006952 | 17         | 2.58          |
| Response to external stimulus       | GO:0009605 | 22         | 2.22          |
| Inflammatory response               | GO:0006954 | 11         | 2.15          |
| Cell migration                      | GO:0016477 | 15         | 1.94          |
| Regulation of immune system process | GO:0002682 | 15         | 1.94          |
| Cytokine-mediated signaling pathway | GO:0019221 | 8          | 1.49          |
| Cell motility                       | GO:0048870 | 15         | 1.44          |
| Localization of cell                | GO:0051674 | 15.00      | 1.44          |

**Gene Ontology: Molecular Function**

| Term name                | Term ID    | # of genes | Log10 p-value |
|--------------------------|------------|------------|---------------|
| Cytokine binding         | GO:0019955 | 7.00       | 4.45          |
| ATPase activity, coupled | GO:0042623 | 6.00       | 1.32          |

**KEGG: Biological Process**

| Term name                              | Term ID    | # of genes | Log10 p-value |
|----------------------------------------|------------|------------|---------------|
| Cytokine-cytokine receptor interaction | KEGG:04060 | 7.00       | 2.05          |

**Table S2.** Top ten de novo gene network lists for all time points. A) E 7.06J vs. 6N (before alcohol), B) E7.25 vehicle-treated 6J vs. 6N, C) E7.5 vehicle-treated 6J vs. 6N, D) E7.25 6J Alcohol vs. Vehicle, E) E7.25 6N Alcohol vs. Vehicle, F) E7.5 6J Alcohol vs. Vehicle, G) E7.5 6N Alcohol vs. Vehicle. Gene networks created with Ingenuity Pathway Analysis.

| A | Diseases and Functions                                                                              | E 7.0 6J vs. 6N              |                      | Molecules                                                                                                                                                                                                                                                                                                                                        |
|---|-----------------------------------------------------------------------------------------------------|------------------------------|----------------------|--------------------------------------------------------------------------------------------------------------------------------------------------------------------------------------------------------------------------------------------------------------------------------------------------------------------------------------------------|
|   |                                                                                                     | -log(Fisher's exact p-value) | Molecules in Network |                                                                                                                                                                                                                                                                                                                                                  |
| 1 | – Cell Cycle<br>– Drug Metabolism<br>– Molecular Transport                                          | 31                           | 15                   | Aak1, Acad11, Adck2, Ahnak, App, Arfgap3, Arglu1, Atp8b1, Ccdc88c, Clpb, Dnah14, Dnajc28, Dynlrb2, Dynlt1, Hspa9, Hspb9, Igsf6, Klf12, Lira5, Mbnl3, Mmp3, Myc, Myo1d, Neat1, Nnt, Nr1h4, Rxr, Sez6l, Sirt5, Tex2, Tktl2, Tmem267, Tnf, Tretinoin, Vgl3                                                                                          |
| 2 | – Cancer<br>– Immunological Disease<br>– Inflammatory Disease                                       | 28                           | 14                   | 26s Proteasome, Anxa11, Btaf1, Cd3, Creb, Cx3cr1, Efcab7, Entpd4, Erk, Fsh, Fxyd5, Gpcr, Histone H3, Hsp70, Htr2b, Ide, Insulin, Mapk, Nfkb (Complex), Pdgf Bb, Pi3k (Complex), Pka, Pkc(S), Plc, Proinsulin, Ras Homolog, Sct, Slc25a12, Src (Family), Tiam1, Tpm4, Ubiquitin, Uqcc2, Vegf, Wt1                                                 |
| 3 | – Cellular Movement<br>– Immune Cell Trafficking<br>– Inflammatory Response                         | 25                           | 13                   | Ap1, Ccl4, Collagen Alpha1, Collagen Type I (Complex), Collagen Type II, Collagen Type IV, Collagen(S), Csf3r, Ddx58, Erk1/2, Fcer1, Fibrinogen, Hsd11b1, Ifn, Ifn Beta, Il-1r, Il1r1, Il1rn, Ldl, Litaf, Mmp, Mmp7, Mmp8, Olr1, Pkc Alpha/Beta, Pro-Inflammatory Cytokine, Rhob, Saa, Sftpd, Sod, Tgf Beta, Tlr, Tnf (Family), Tnfrsf9, Trypsin |
| 4 | – Cancer<br>– Endocrine System Disorders<br>– Organismal Injury and Abnormalities                   | 25                           | 13                   | Akt, Ampk, C1qtnf5, Chemokine, Cytokine, Hp1bp3, Ili16, Ifn Alpha/Beta, Ifn Type 1, Ifnar, Ige, Igg, Igg1, Igm, Il1, Il12 (Complex), Il12 (Family), Immunoglobulin, Interferon Alpha, Irf7, Kit, Lh, Map2k1/2, Mtdh, N-Cor, Nfkbiz, Nos, Osbp15, P70 S6k, P85 (Pik3r), Pglyrp1, Pthlh, S100a9, Top2b, Wdfy1                                      |
| 5 | – Cellular Movement<br>– Hematological System Development and Function<br>– Immune Cell Trafficking | 18                           | 10                   | Adm2, Atp11b, Ccr1, Cd200, Cdx2, Cx3cr1, D1pas1, Defa1 (Includes Others), Defb104a/Defb104b, Gjb4, Gpr132, Gstp1, Hsh2d, Jnk, Lgals8, Mannan, Mip1, Mir-127, Mrc1, Mrc2, Nipal1, P38 Mapk, Pla2g7, Prr9, Rara, Retnlg, S1pr2, Sparc, Stra6, Tcr, Tlr10, Tmcc3, Tmem184a, Tnfrsf18, Traf5                                                         |
| 6 | – Cell Morphology<br>– Cellular Assembly and Organization<br>– Post-Translational Modification      | 16                           | 9                    | 1, 3, 4-Ip3, B4galt4, Brd8, Ceacam10, Ck2, Defb8, E2f8, Egf, Ep400, Epc1, H2az1, H4c4, Hdac2, Hoxc9, Ing2, Ing3, Irs1, Itpkc, Mier2, Mis18a, Nes, Oip5-As1, Papss1, Pcgf2, Pold2, Rbbp4, Rffl, Sap130, Sp3, Spr2h, St5, Tcf21, Tip60, Tp53, Ube2q2                                                                                               |

| B | Diseases and Functions                                                                                | E 7.25 6J vs. 6N Vehicle-treated |                      | Molecules                                                                                                                                                                                                                                                                                                                      |
|---|-------------------------------------------------------------------------------------------------------|----------------------------------|----------------------|--------------------------------------------------------------------------------------------------------------------------------------------------------------------------------------------------------------------------------------------------------------------------------------------------------------------------------|
|   |                                                                                                       | -log(Fisher's exact p-value)     | Molecules in Network |                                                                                                                                                                                                                                                                                                                                |
| 1 | – Antimicrobial Response<br>– Cell Death and Survival<br>– DNA Replication, Recombination, and Repair | 39                               | 22                   | Asb9, Bglap, Casp12, Caspase, Cd200r1, Ces, Ces1b/Ces1c, Ces4a, Cngb3, Cytochrome C, Ecm, Fap, Granzyme, Gzma, Gzmb, Gzmc, Gzmh, Hsp27, Hsp70, Il12 (Family), Il6, Jun/Junb/Jund, Mir124a-1hg, Mt3, Nfkb (Complex), Padi2, Rxr, Serine Protease, Serpinb12, Spink5, Tcr, Tmprss11b, Tmprss7, Trim69, Usp17la (Includes Others) |

|    |                                                                                                                                                                                                         |    |    |                                                                                                                                                                                                                                                                                                                                                                                                           |
|----|---------------------------------------------------------------------------------------------------------------------------------------------------------------------------------------------------------|----|----|-----------------------------------------------------------------------------------------------------------------------------------------------------------------------------------------------------------------------------------------------------------------------------------------------------------------------------------------------------------------------------------------------------------|
| 2  | <ul style="list-style-type: none"> <li>Cell-To-Cell Signaling and Interaction</li> <li>Drug Metabolism</li> <li>Nervous System Development and Function</li> </ul>                                      | 34 | 20 | Alpha Catenin, Ampk, Atp1b4, Calpain, Capn11, Cd3, Cd4, Cg, Cpa3, Creb, Efcab7, Fmo3, Fsh, Gabrg2, Glucuronosyltransferase, Hbg2, Histone H3, Hla-A, Hoxd10, Il1, Il1bos, Kcnj1, Mek, Nr2e1, P38 Mapk, Pi3k (Complex), Pkc(S), Ppp1r1b, Psca, Slco2b1, Tm4sf1, Ugt2a3, Ugt2b17, Ugt2b28, Vegf                                                                                                             |
| 3  | <ul style="list-style-type: none"> <li>Cell Signaling</li> <li>Molecular Transport</li> <li>Vitamin and Mineral Metabolism</li> </ul>                                                                   | 32 | 19 | Amylase, Ccl1, Col28a1, Collagen, Collagen Type Ii, Cxcl13, Elastase, Erk1/2, Fcna, Fgf7, Fibrin, Gp6, Hcrt, Hla-Dr, Ifn Alpha/Beta, Il36b, Irak3, Klra7 (Includes Others), Lum, Mhc Class I (Complex), Mhc Ii, Mmp, Ppp1r3a, Pro-Inflammatory Cytokine, Reg3g, Rgs13, Serpina1, Syk/Zap, Tlr, Tnf (Family), Tnfsf15, Trem1, Trypsin, Ucn2, Xcl1                                                          |
| 4  | <ul style="list-style-type: none"> <li>Hematological System Development and Function</li> <li>Hematopoiesis</li> <li>Humoral Immune Response</li> </ul>                                                 | 30 | 18 | Aim2, Akt, Bcr (Complex), Cd180, Cd36, Ctnna3, Dbh, Fcamr, Gcsam, Gm9573, Gpnmb, Hemoglobin, Ifn Beta, Ifnar, Iga, Igg, Igg1, Igg2a, Igg2b, Igg3, Igm, Il12 (Complex), Insrr, Ly9, Lyg2, Medag, Mhc Class Ii (Complex), Pax5, Plc Gamma, Stat5a/B, Tfap2b, Tnfrsf17, Trim29, Vav, Wap                                                                                                                     |
| 5  | <ul style="list-style-type: none"> <li>Cell Signaling</li> <li>Molecular Transport</li> <li>Vitamin and Mineral Metabolism</li> </ul>                                                                   | 25 | 16 | Adcy, Adgrf1, Bdkrb1, Calcr1, Calmodulin, Ccr6, Chemokine, Chemokine Receptor, Collagen Type I (Complex), Cxcr1, Cyp2c9, Dynlt1, Ffar2, Fshr, G Protein, G Protein Alpha, Ghrhr, Gpcr, Grm1, Growth Hormone, Gsk3, Jnk, Lh, Mapk, Myoc, Npy, Pka, Plc, Rac, Ras, Serpina3g (Includes Others), Tacr1, Tsh, Tshr, Voltage-Gated Calcium Channel                                                             |
| 6  | <ul style="list-style-type: none"> <li>Cell-To-Cell Signaling and Interaction</li> <li>Skeletal and Muscular System Development and Function</li> <li>Visual System Development and Function</li> </ul> | 23 | 15 | Akr1c3, Aldh1a2, Aldose Reductase, Alp, Ap1, Calml5, Ces1, Collagen(S), Erk, Fcer1, Fgf, Fgf6, Ghrl, Gk, Hdl, Ige, Il23, Krt75, Ldl, Liltrb3, Myh4, Mylk2, Myosin, Nacph Oxidase, Nr1h, Pdgf Bb, Pi3k P85, Prkaa, Prl2c2 (Includes Others), Rap1gds1, Rock, Slfn12l, Src (Family), Tgf Beta, Txk                                                                                                          |
| 7  | <ul style="list-style-type: none"> <li>Cardiovascular System Development and Function</li> <li>Cellular Function and Maintenance</li> <li>Tissue Morphology</li> </ul>                                  | 23 | 15 | 60s Ribosomal Subunit, Abca13, Adamts13, Add1, Alas2, Aldh3b1, Arnt2, Bbox1, Cldn13, Clk1, Ddx54, Ess2, Fbxl18, Gata2, Gdf2, Grm6, Gypa, Hemgn, Krt40, Ly6a (Includes Others), Mrgprx3, Myc, Nat3, Ncaph, Noc2l, Nsf11c, Prrg4, Rad2111, Rfli, Rhag, Rpl39l, Tmem200c, Tsga10ip, Vcp, Wapl                                                                                                                |
| 8  | <ul style="list-style-type: none"> <li>Cell Morphology</li> <li>Cellular Function and Maintenance</li> <li>Developmental Disorder</li> </ul>                                                            | 21 | 14 | 26s Proteasome, 4930417o13rik, Acyl-Coenzyme A, Aim2 Inflammasome, Alas2, Cd209d, Ceacam20, Ctcf, Cyp1a2, Cytokine, Defb8, Ep400, H4c4, Histone, Histone H4, Hsp90, Ide, Immunoglobulin, Insulin, Interferon Alpha, Klhl38, Midn, Mylip, Paf1, Phosphatidylinositol 3, 4-Diphosphate, Phosphatidylinositol-3-Phosphate, Pla2g2a, Pold2, Ppm1k, Prap1, Proinsulin, Rna Polymerase Ii, Tip60, Tssk1b, Wdfy1 |
| 9  | <ul style="list-style-type: none"> <li>Cell-To-Cell Signaling and Interaction</li> <li>Nervous System Development and Function</li> <li>Organismal Injury and Abnormalities</li> </ul>                  | 21 | 14 | Acot5, Bdnf, Cntnap5, Ctcf, Drd1, Endocannabinoid, Fabp2, Foxa1, Ftsj3, Gpx4, Grb2, H1-1, Kri1, Ly6g6f, Nkx2-5, Olfr503, Or4n2, Pcdhb3, Pcdhb7, Pcdhb8, Plod1, Ppara, Ppp1r1b, Rp11l, Rps27, S100a10, Scn10a, Scn11a, Sec14l5, Set, Set Complex, Slc17a8, Tespa1, Vgf, Xrn2                                                                                                                               |
| 10 | <ul style="list-style-type: none"> <li>Cell-To-Cell Signaling and Interaction</li> <li>Cellular Function and Maintenance</li> <li>Nervous System Development and Function</li> </ul>                    | 21 | 14 | 9-Cis-Retinal, Akap5, Apol11b (Includes Others), Apol9a/Apol9b, App, Arglu1, Asic1, Asic2, Asic3, Cdr1, Chrnb3, Crx, Dhx33, Dlg4, Dmrt1, Dmrtc2, Dopamine, Endocannabinoid, Etd, Girk, Gpr37, Gpr78, Hcrt1, Ifn, Ifnar1, Irak, Myot, Opn5, Rho, Rnu12, Sectm1, Snrmp, Spata16, Tlr7, Trpv3                                                                                                                |

**C E 7.5 6J vs. 6N Vehicle-treated**

|   | Diseases and Functions                                                                                                                                                                                         | -log(Fisher's exact p-value) | Molecules in Network | Molecules                                                                                                                                                                                                                                                                                                                                                                                                                   |
|---|----------------------------------------------------------------------------------------------------------------------------------------------------------------------------------------------------------------|------------------------------|----------------------|-----------------------------------------------------------------------------------------------------------------------------------------------------------------------------------------------------------------------------------------------------------------------------------------------------------------------------------------------------------------------------------------------------------------------------|
| 1 | <ul style="list-style-type: none"> <li>Drug Metabolism</li> <li>Lipid Metabolism</li> <li>Small Molecule Biochemistry</li> </ul>                                                                               | 50                           | 26                   | Aim2, Amy2a, Amylase, Anxa13, Bglap, Cd200r1, Cdh16, Cebpe, Ces, Ces1, Ces3, Ces4a, Collagen Type Ii, Ctrb2, Cyp7a1, Erk1/2, Fgf7, Growth Hormone, Hcrt, Il36g, Klrc1, Magea3 (Includes Others), Mug1/Mug2, Mycs, Nxph2, Prex1, Proinsulin, Pxr Ligand-Pxr-Retinoic Acid-Rxra, Rxr, Slco1b3, Syt2, T3-Tr-Rxr, Tph2, Ubash3a, Ucn3                                                                                           |
| 2 | <ul style="list-style-type: none"> <li>Connective Tissue Development and Function</li> <li>Digestive System Development and Function</li> <li>Skeletal and Muscular System Development and Function</li> </ul> | 42                           | 23                   | Ackr2, Afm, Akt, C3ar1, Cd207, Cd55, Collagen Type I (Complex), Collagen Type Iv, Collagen(S), Csta, Ctsk, F9, Fhit, Fmod, Gm9573, Heph1l, Iga, Igg2a, Igg2b, Il23, Itga11, Ldl, Lyg2, Mucin, Myoc, Or51e2, Pdgf Bb, Prg3, Reg3a, Scgb3a1, Serpinb7, Siglec15, Slc13a1, Tcl1a, Tgf Beta                                                                                                                                     |
| 3 | <ul style="list-style-type: none"> <li>Post-Translational Modification</li> <li>Protein Degradation</li> <li>Protein Synthesis</li> </ul>                                                                      | 42                           | 23                   | Ano3, Ccl1, Ccl24, Ccl7, Cd209c, Cd8b, Cnga3, Fcer1, Gngt1, Ifn Alpha/Beta, Ifn Beta, Ifnar, Ifnz (Includes Others), Interferon Alpha, Klk12, Klk5, Klra7 (Includes Others), Mhc Class I (Complex), Mhc Class I (Family), Mhc Class Ii (Complex), Mx2, Nfkb (Complex), Pmaip1, Prss42p, Serine Protease, Serpinb10, Slc46a2, Tap2, Tmprss11e, Tmprss15, Tmprss7, Tnf (Family), Tnfrsf17, Trypsin, Usp17la (Includes Others) |
| 4 | <ul style="list-style-type: none"> <li>Cancer</li> <li>Dermatological Diseases and Conditions</li> <li>Organismal Injury and Abnormalities</li> </ul>                                                          | 35                           | 20                   | Adamts14, Alb, Atp6v1g3, Bcr (Complex), Chst4, Col8a1, Cox6a2, Creb, Ctnna3, Cxcl3, Cyclin A, Erk, Fhl5, Gabrg2, Gcsam, Gm10408 (Includes Others), Ige, Igg, Igg1, Il1, Il12 (Complex), Il13ra2, Immunoglobulin, Keratin, Krt16, Krt20, Krt73, Lh, Map2k1/2, Pax8, Pck2, Pou2af1, Ppy, Pro-Inflammatory Cytokine, Sos                                                                                                       |
| 5 | <ul style="list-style-type: none"> <li>Developmental Disorder</li> <li>Endocrine System Disorders</li> <li>Hematological Disease</li> </ul>                                                                    | 28                           | 17                   | 26s Proteasome, Asb9, Calmodulin, Cd3, Chemokine, Cxcr6, Cytokine, Efcab7, Gpcr, Gpr119, Gpr22, Gpr37, Histone H3, Histone H4, Hsp70, Hsp90, Itgad, Jnk, Kcnj1, Kcnj16, Micb, Pi3k (Complex), Pka, Pkc(S), Rb, Rho, Slc12a1, Tcr, Tesk2, Tnn, Tp63, Ube2d4, Ubiquitin, Vegf, Wdfy1                                                                                                                                          |

|    |                                                                                                                                                               |    |    |                                                                                                                                                                                                                                                                                                                                                                       |
|----|---------------------------------------------------------------------------------------------------------------------------------------------------------------|----|----|-----------------------------------------------------------------------------------------------------------------------------------------------------------------------------------------------------------------------------------------------------------------------------------------------------------------------------------------------------------------------|
| 6  | <ul style="list-style-type: none"> <li>– Cancer</li> <li>– Endocrine System Disorders</li> <li>– Gastrointestinal Disease</li> </ul>                          | 26 | 16 | Abr, Ahctf1, Alms1, Alpk2, Atxn7, Bbox1, Ccdc27, Ccdc88c, Cnm2, Cntnap3, Ctf, Ctnnb1, Cyb5b, Fhit, Gabrq, Gjd4, Hepacam, Itprid2, Lhx6, Lmna, Lnx1, Lvrn, Mastl, Nes, Pcdhb8, Pcdhb8, Plec, Rasi11b, Rnf133, Ropn1, Sall1, Spag11b, Ube2i, Ube2q1, Virma                                                                                                              |
| 7  | <ul style="list-style-type: none"> <li>– Cancer</li> <li>– Organismal Injury and Abnormalities</li> <li>– Tissue Morphology</li> </ul>                        | 23 | 15 | Abcb8, Adam30, Ankrd34c, Atf3, Bpifc, Cpn2, Creb1, Cst9l, Dio2, Dmrt1, Dnm3os, Fbxw21 (Includes Others), Glra1, Hmnr, Ifi202b, Kcnb1, Mapk1, Metalloprotease, Myl6b, Nr1h5, Pdcl2, Prkar2a, Prl3c1, Rest, Rhox3a (Includes Others), Robo1, S6k1, Scn10a, Scn3b, Tp53, Traf6, Trank1, Triiodothyronine, Reverse, Vnn1, Vsig1                                           |
| 8  | <ul style="list-style-type: none"> <li>– Nutritional Disease</li> <li>– Psychological Disorders</li> <li>– Small Molecule Biochemistry</li> </ul>             | 21 | 14 | 14, 15-Epoxyeicosatrienoic Acid, Adamdec1, Ar, Beta-Estradiol, Cilp, Cldn18, Cldn6, Drd4, Ear2 (Includes Others), Elovl2, Endothelin, Eppin, Gata2, Gchfr, Gp2, Gpr37, Grk4, Hemgn, Htr6, Ifi202b, Mak, Mhc Class Ii (Complex), Mir-24-3p (And Other Mirnas W/Seed Ggcucag), Msmo1, Myc, Ntf4, Parp8, Pmm2, Pomc, Sprr2g, Sprr2i, Tbx19, Tgm6, Transglutaminase, Zg16 |
| 9  | <ul style="list-style-type: none"> <li>– Cell Cycle</li> <li>– Cell Morphology</li> <li>– Cell-To-Cell Signaling and Interaction</li> </ul>                   | 19 | 13 | Actl7b, App, Brms1, Ccnb2, Ccnb3, Clec2e/Clec2h, Crebbp, Crybb2, Endothelin, Gjb1, Gng2, Hmgb4, Hspa2, Iqcf5, Kcnn4, Kctd16, Lsmem1, Mac, Mastl, Ms4a15, Nanog, Prkar2a, Psg18 (Includes Others), Ptger2, Rnasel, Sik2, Slc25a13, Stfa2/Stfa211, Sycp2l, Tbx22, Tigd4, Tik, Usp8, Utp, Zdhhc21                                                                        |
| 10 | <ul style="list-style-type: none"> <li>– Cell Cycle</li> <li>– Cell-To-Cell Signaling and Interaction</li> <li>– Cellular Growth and Proliferation</li> </ul> | 17 | 12 | 9830107b12rik/A530064d06rik, Abcb9, Aim2, Apol11b (Includes Others), Bc048679, Chil3/Chil4, Cntnap5, Crabbp1, Ctsk, Cyp4f11, Dyrk2, Eln, Ern2, Esr1, Fmr1, Gchfr, Gvin1 (Includes Others), Hla Class I, Hla-G, Ifi202b, Ifng, Muc2, Nr1d1, Pcdhb14, Pcdhb4, Pla2g7, Rcvrn, Tgfr2, Th2 Cytokine, Ticam2, Tlr3, Tnfsf9, Tretinoin, Ttc22, Uba6                          |

**D** **E 7.25 6J Alcohol vs. Vehicle**

|   | Diseases and Functions                                                                                                                               | -log(Fisher's exact <i>p</i> -value) | Molecules in Network | Molecules                                                                                                                                                                                                                                                                                                                                                                                                                                                                                                                                                                                                                      |
|---|------------------------------------------------------------------------------------------------------------------------------------------------------|--------------------------------------|----------------------|--------------------------------------------------------------------------------------------------------------------------------------------------------------------------------------------------------------------------------------------------------------------------------------------------------------------------------------------------------------------------------------------------------------------------------------------------------------------------------------------------------------------------------------------------------------------------------------------------------------------------------|
| 1 | <ul style="list-style-type: none"> <li>– Cancer</li> <li>– Gastrointestinal Disease</li> <li>– Hepatic System Disease</li> </ul>                     | 99                                   | 64                   | Aasdh, Abcb8, Aebp2, Aldh3b1, Amfr, Ammrec1, Anxa10, Apbb2, Arhgap23, Atp2a2, Atpase, Bag3, Banp, Bod1, Btdb1, Caap1, Cacybp, Carm1, Carnmt1, Crebrf, Dars1, Eed, Entpd2, Faf1, Fxr2, G3bp1, Glud1, H1-0, Hdac, Hemgn, Hsp70, Hspa5, Hspa8, Hspd1, Hsph1, Klhdc2, Lrrc47, Map1lc3, Mapre1, Mettl17, Mpp6, Mrps27, Noa1, Nr2e1, Ogt, Pcbp1, Pex6, Ppp1r10, Pto1, Rabl3, Rbm26, Rbpms, Rif1, Rpa, Sfpq, Slc35e1, Slco2b1, Smc4, Spg7, Tmem165, Trim29, Trmt12, Trmt44, Tssk1b, Ube2m, Ubxn2b, Ugt2b17, Vegf, Ywhah, Znf746                                                                                                       |
| 2 | <ul style="list-style-type: none"> <li>– Cell Morphology</li> <li>– Drug Metabolism</li> <li>– Endocrine System Development and Function</li> </ul>  | 89                                   | 60                   | Alkbh5, Asb13, B4galt4, Bbc3, Bbs4, Bmt2, Brd7, Brpf3, Cables2, Capns2, Ccnt1, Ccny, Cct3, Cct4, Cdc73, Cnppd1, Cofilin, Ctbp1, Ctdp1, Dazap2, Dnaja1, Eif4a2, Ercc8, Fam91a1, Fkbp5, Gcn5l, Gmcl1, Gtf2e2, Histone, Histone H3, Holo Rna Polymerase Ii, Inpp5k, Ipmk, Kdm1a, Kiaa2013, Mark3, Mbd3, Mcmbp, Mettl3, Mi2, Mlc1, Nars1, Nurd, Oma1, Orc3, P-Tefb, P38 Mapk, P4ha1, Pard3, Pard6b, Parp16, Paxbp1, Per1, Pmpcb, Ppp2r2d, Rhof, Rsrc2, Slc6a12, Snx5, Spata20, Spata3, Srsf2, Srsf9, Stip1, Strn3, Suv39h2, Tada3, Taf10, Taf5, Tip60                                                                              |
| 3 | <ul style="list-style-type: none"> <li>– Cancer</li> <li>– Cellular Development</li> <li>– Tissue Development</li> </ul>                             | 84                                   | 58                   | 5730488b01rik, Ahcy1l, Alp, Alpg, Asb15, Bmp1, Cbx6, Chac1, Cirbp, Collagen Alpha1, Commd3-Bmi1, Coq2, Ctbp, Erk, Exog, Exosc6, Farnesyl Transferase, Fgf, Gata6, Get4, Hedgehog, Hes1, Hoxa9, Hoxd10, Leng8, Loxl1, Luc7l, Mafg, Mllt1, Mocs3, Mrps30, Napsa, Nog, Nop56, P3h2, Pip4k2a, Plcd3, Prc2, Prl2c2 (Includes Others), Prmt2, Pscs, Ptch1, Rangap1, Riox1, Riox2, Rnr, Rrs1, Sdr39u1, Sifn12l, Smarca5, Sox, Sox17, Sox18, Sox2, Sox4, Spout1, Tcf, Tigd5, Tle1, Trmt10c, Trmt1l, Tsc22d1, Ugcg, Wars2, Wdr77, Wnt, Yars2, Ypel5, Zc3h14, Zmynd19                                                                    |
| 4 | <ul style="list-style-type: none"> <li>– Cancer</li> <li>– Connective Tissue Disorders</li> <li>– Organismal Injury and Abnormalities</li> </ul>     | 73                                   | 53                   | 26s Proteasome, Alyref, Ankrd13a, Apc/Apc2, Arrdc3, Arrdc4, Atp6v0d2, B3gnt5, Barx1, Bmp, Bok, Ccdc155, Cldn5, Clec4g, Cnpy3, Csnk1g3, Ctnna3, Eotaxin, Fam161a, Fgfbp1, Galnt1, Gas1, Gml, Got, Hoxd9, Hsd3b1, Igg, Igg2a, Igg2b, Igl1/Igl5, Il25, Irak3, Lman2l, Lrig1, Lrrtm1, Mhc Class I (Family), Mhc Ii, Mir101, Mrm3, Msl2, Mto1, Nfkb (Complex), Noct, Otulin, P Glycoprotein, Rab6b, Rbm15b, Rnf11, Rnf149, Slc22a16, Srxn1, Tespa1, Tmem245, Tnfrsf17, Tnfsf15, Tpcn2, Trim10, Trim44, Trim8, Tspan33, Tysnd1, Ube2, Ube2q2, Ube2r2, Ubiquitin, Ubiquitin Ligase, Vacuolar H Atpase, Vash1, Wipi1, Zfand5           |
| 5 | <ul style="list-style-type: none"> <li>– Cardiac Necrosis/Cell Death</li> <li>– Cardiovascular Disease</li> <li>– Cell Death and Survival</li> </ul> | 60                                   | 47                   | Adrb, Alcohol Group Acceptor Phosphotransferase, Alpha Actin, Asb9, Becn1, Btg3, Cab39, Calcineurin A, Cdc25b, Cg, Chrna6, Chrb3, Cited2, Creatine Kinase, Dapk3, Dil3, Dusp10, E2f1, Eno2, Ephb, Etfbkmt, Fjx1, Fsh, Gamma Tubulin, Gna11, Grk6, Hsd17b1, Klfl1, Lh, Lmcd1, Mapk1, Mapk1ip1, Mapkapk2, Mcl1, Mef2, Mef2b, Mlc, Mlcp, Myh4, Mylk2, Myosin-Light-Chain Kinase, Neurod4, Ngf, Notch, Nrg (Family), Oxsr1, Pawr, Pi3k (Family), Pkn1, Plat, Ppp6r1, Ptpase, Ptpa, Pyy, Rasal2, Rnf130, Secreted Mmp, Slx1a/Slx1b, Smad6, Snx18, Sod, Spata5l1, Src (Family), Stk39, Tcaf2, Timp2, Tm4sf1, Tmem158, Tmsb4, Tsc22d2 |



|    |                                                                                                                                                                  |    |    |                                                                                                                                                                                                                                                                                                                                                                                                                                                                                                                                                                                                                                                                                                                      |
|----|------------------------------------------------------------------------------------------------------------------------------------------------------------------|----|----|----------------------------------------------------------------------------------------------------------------------------------------------------------------------------------------------------------------------------------------------------------------------------------------------------------------------------------------------------------------------------------------------------------------------------------------------------------------------------------------------------------------------------------------------------------------------------------------------------------------------------------------------------------------------------------------------------------------------|
| 6  | <ul style="list-style-type: none"> <li>– Energy Production</li> <li>– Lipid Metabolism</li> <li>– Small Molecule Biochemistry</li> </ul>                         | 49 | 41 | Adh1c, Agfg1, Akirin2, Akr1c3, Ap5z1, Bag1, Brms1l, C/Ebp, Calc, Cbp/P300, Cd207, Coup-Tf, Crebzf, Cuzd1, Cyp11b2, Dgk, Dgkz, Emcn, Erk1/2, Estrogen Receptor, Gc-Gcr Dimer, Gm9573, Hdac7, Histone Deacetylase, Histone H4, Hnf3, Hnf4g, Iga, Jink1/2, Jun/Junb/Jund, Klf9, Meitl16, Mknk2, Mrrf, Muc5b, Mucin, N-Cor, Ncor1, Nr0b2, Nr1h, Nr2f6, Pepck, Phf23, Pki, Pnrc1, Polr2m, Ppp1r3a, Rar, Rdh, Reg3g, Rxr, Sbsn, Sdr16c5, Sema3f, Serpinf1, Slc44a1, Spink5, Suds3, Swi-Snf, T3-Tr-Rxr, Tbx1, Tfiia, Thymidine Kinase, Thyroid Hormone Receptor, Tlr7/8, Tph2, Ube2j2, Ucp3, Vitamind3-Vdr-Rxr, Wdr92                                                                                                       |
| 7  | <ul style="list-style-type: none"> <li>– Connective Tissue Disorders</li> <li>– Inflammatory Disease</li> <li>– Organismal Injury and Abnormalities</li> </ul>   | 44 | 38 | Abhd17b, Ago2, Ago2-Mirlet7, Ankrd10, Ap1ar, Arl5a, Atp1b4, Cnot6, Cpd, Ddx56, Eif2, Eif2s1, Elavl1, Fam135a, Fam83f, Fbxo27, Gpr180, Gtpase, Hdhd2, Hras, Hsp90, Ifi27, Iigp1, Interferon Alpha, Ints11, Lamp1, Lmf1, Mex3d, Mir-323-3p (And Other Mirnas W/Seed Acauuag), Mir-330, Mir-363, Mir-423, Mir-423-5p (And Other Mirnas W/Seed Gagggggc), Mob3b, Nadk2, Nfic, Oaf, Oas1b, Pank1, Pank3, Pdc7, Pdia4, Pp1/Pp2a, Ppfia1, Ppfibp2, Ppp2ca, Ppp2r3d, Pptc7, Proinsulin, Prom2, Rasa4, Rbpj, Rna Polymerase Ii, Rnase A, Sfta2, Sh3d19, Smad2/3, Smco3, Spast, Tarbp2, Tbc1d20, Tbc1d30, Tmem14a, Tmem65, Tnf (Family), Txnip, Ubp1, Ulk2, Xxylt1, Zcchc7                                                     |
| 8  | <ul style="list-style-type: none"> <li>– Cell Death and Survival</li> <li>– Cellular Compromise</li> <li>– DNA Replication, Recombination, and Repair</li> </ul> | 40 | 36 | 7s Ngf, Alpha 1 Antitrypsin, Alpha Tubulin, Beta Tubulin, Ces, Ces1b/Ces1c, Collagen Type Ii, Ctl2a/Ctl2b, Cytokine Receptor, Ecm, Enac, Fam171a2, Fbxo31, Fbxw8, Fc Gamma Receptor, Fcer1, Fgd1, Granzyme, Gzma, Gzmb, Gzmc, Gzmh, Hsp, Ifit1, Ifn, Ifn Alpha/Beta, Ifn Beta, Ifn Type 1, Ifnar, Il12 (Complex), Il1r1, Il20rb, Il6, Jak, Kallikrein, Kik3, Kik7, Klrb1, Liltr3, Map6, Mapkap2/3, Mbp, Mep1a, Mhc, Mhc Class I (Complex), Mhc Class Ii (Complex), Mir122a, B, Mir124, Mirlet7, Msln, Mus81, Pdk2, Polg2, Prss3, Rgmb, Rnasel, Scarb2, Serine Protease, Serpina1, Serpina9, Syk/Zap, Tap2, Tec/Btk/Itk/Txk/Bmx, Th2 Cytokine, Tlr, Tmem189, Tmprss7, Trypsin, Txk, Vbp1                              |
| 9  | <ul style="list-style-type: none"> <li>– Nervous System Development and Function</li> <li>– Organ Morphology</li> <li>– Tissue Morphology</li> </ul>             | 35 | 33 | Adam19, Adamts13, Agfg2, App, Arl5c, Arl8a, Arnt2, Brwd1, Cd200r1l, Cpn2, Csnk1g1, Ddx43, Dnajb14, Dnajc30, Entpd2, Fbxl20, Fcho1, Filip1, Gjd4, Gucd1, Gypa, H2-K2/H2-Q9, H2-M2, Hspb7, Il20rb, Il4, Jtb, Kcnq1, Kctd16, Krt40, Laptm4a, Lnx1, Ly6a (Includes Others), Ly6d, Mobp, Mturn, Myot, Nat3, Nudt11, Pcyt1b, Pdxp, Pkib, Purg, Rnf144b, Rnf38, Rwd2b, Serpinb6b, Slc25a38, St6galnac6, Stac2, Tcpl0/Tcp10l2, Tmem176b, Tmem59, Tp73, Traf6, Tshz2, Ubc, Ubl3, Ulk2, Usp6, Wars2, Wfdc8, Zadh2, Zdhhc14, Zfand5, Znf202, Znf706, Znr1, Zscan16, Zxdc                                                                                                                                                        |
| 10 | <ul style="list-style-type: none"> <li>– Amino Acid Metabolism</li> <li>– Cardiovascular Disease</li> <li>– Organismal Injury and Abnormalities</li> </ul>       | 34 | 32 | Actin, Agpat5, Alpha Actinin, Alpha Catenin, Angel2, Angpt2, Calpain, Camp-Dependent Protein Kinase, Casein, Chordc1, Cnga2, Collagen, Collagen Type I (Complex), Collagen Type I (Family), Collagen Type Iv, Collagen(S), Creb, Eif4ebp2, Eif4g, Eva1c, Exoc3, Exoc8, Fam136a, Fgfr, Focal Adhesion Kinase, G Protein Alphas, Gaba-A Receptor, Gabrg2, Gcl, Gclm, Gp6, Gria2, Growth Hormone, Gq, Histone H1, Hrg, Hsp27, Importin Beta, Integrin, Itpka, Jak1/2, Laminin (Complex), Lfa-1, Lrp, Lum, Mapk, Mmp, Nup35, Pi3k (Complex), Pkc(S), Plc Beta, Plc Gamma, Pom121/Pom121c, Pp2a, Prap1, Prkcg, Ptk, Rab5, Secretase Gamma, Si, Spp1, Tars2, Tgf Beta, Ubqln1, Uros, Vps50, Vps51, Ythdc1, Ythdf1, Znf804a |

## E E 7.25 6N Alcohol vs. Vehicle

|   | Diseases and Functions                                                                                                                                             | -log(Fisher's exact $p$ -value) | Molecules in Network | Molecules                                                                                                                                                                                                                                                                                                                                                                                                                                                                                                                                                                           |
|---|--------------------------------------------------------------------------------------------------------------------------------------------------------------------|---------------------------------|----------------------|-------------------------------------------------------------------------------------------------------------------------------------------------------------------------------------------------------------------------------------------------------------------------------------------------------------------------------------------------------------------------------------------------------------------------------------------------------------------------------------------------------------------------------------------------------------------------------------|
| 1 | <ul style="list-style-type: none"> <li>– Cancer</li> <li>– Gastrointestinal Disease</li> <li>– Organismal Injury and Abnormalities</li> </ul>                      | 94                              | 60                   | 26s Proteasome, Ankrd13a, Apc (Complex), Arrdc1, Aven, Azin1, Bmt2, Btd1, C1ql4, Caap1, Cab39, Cab39l, Carnmt1, Casein, Ccar1, Ccdc149, Cd200r1, Cdy1, Ctcf, Cxxc1, Exog, Gmcl1, Haus4, Histone, Hivp3, Hoxc10, Kdm4b, Krt75, Leng8, Lypd3, Map4k2, Mark3, Mex3c, Mfh1, Micu2, Mif4gd, Nfkb (Complex), Nr2e1, Parp, Parp16, Pdk2, Pip4k2a, Pip4k2b, Pkh1, Plcd3, Prickle3, Prkaa, Pxx, Rbm26, Rcbtb2, Rnf25, Serpina12, Smurf1, Sult2b1, Tbrg4, Traf, Trib3, Trim13, Trim44, Trim69, Trmt11, Ube2, Ube2g2, Ube2q2, Ubiquitin, Utp4, Znf263, Znf414, Znf761, Zranb1                  |
| 2 | <ul style="list-style-type: none"> <li>– Cell Cycle</li> <li>– Cellular Assembly and Organization</li> <li>– DNA Replication, Recombination, and Repair</li> </ul> | 94                              | 60                   | Actr5, Alpha Catenin, Anapc4, Atpase, Bbs4, Bcor, Cbp/P300, Ccdc117, Ccnl2, Cdc73, Cdipt, Ceacam, Ceacam20, Colec12, Dars1, Daxx, Fam161a, Fam91a1, Fbxo17, Fbxw21 (Includes Others), Figla, Fsd2, Histone H3, Hnrnp1, Hspa8, Igdcc3, Il1bos, Ilf2, Kdm1a, Kih15, Lman2l, Mapk, Mapre1, Meitl3, Mi2, Myo19, Nlrp4b, Nsun4, Orc3, P-Tefb, Padi6, Pex6, Phkg2, Polr3h, Ppp2ca, Prkab1, Rbbp4, Rbpj, Rgs13, Rna Polymerase Ii, Rnr, Samd7, Smarca5, Sohlh1, Sp9, Spata19, Spice1, Spout1, Srsf2, Supt16h, Tcf19, Tmem25, Troap, Tssk1b, Tuba4a, Ythdc1, Ythdf1, Zbtb1, Znf639, Znf804a |
| 3 | <ul style="list-style-type: none"> <li>– Gastrointestinal Disease</li> <li>– Neurological Disease</li> <li>– Organismal Injury and Abnormalities</li> </ul>        | 59                              | 44                   | Akr1c4, Amylase, Ankrd39, Anxa10, Arrb2, Bag3, Bdkrb1, Calmodulin, Card19, Cg, Chrm3, Ck2, Cpa3, Csnk1g3, Cyp4a11, Dazap2, Efcab5, Exoc3, Ffar2, Focal Adhesion Kinase, Fsh, Gbp6, Gnrh, Gpcr, Gpr160, Gpr4, Gpr50, Gpr88, Gtpase, Hemoglobin, Hsp90, Htr1d, Htr2b, Ice2, Ikk (Complex), Insulin, Klf1, Mtorc1, Ncbp2, Pka, Plc, Prmt3, Pstpip2, Ptpzr1, Rab5c, Rac1, Ras Homolog, Rnf208, Rxfp1, Secretase Gamma, Sfk, Shc, Slc8b1, Slitrk1, Smarcal1, Src (Family), Sstr1, Stat, Stxbp4, Tas1r2, Tcf, Tcr, Tmem17, Tnk1, Tpcn2, Tsc22d1, Tsc22d2, Tubulin, Vamp2, Vegf            |

|    |                                                                                                                                                                               |    |    |                                                                                                                                                                                                                                                                                                                                                                                                                                                                                                                                                                                                                                                                                                |
|----|-------------------------------------------------------------------------------------------------------------------------------------------------------------------------------|----|----|------------------------------------------------------------------------------------------------------------------------------------------------------------------------------------------------------------------------------------------------------------------------------------------------------------------------------------------------------------------------------------------------------------------------------------------------------------------------------------------------------------------------------------------------------------------------------------------------------------------------------------------------------------------------------------------------|
| 4  | <ul style="list-style-type: none"> <li>Cell Morphology</li> <li>Cellular Development</li> <li>Cellular Movement</li> </ul>                                                    | 49 | 39 | Acac, Actin, Afmid, Akirin2, Alp, Arp2/3, Arrdc4, Bcar1, Collagen, Collagen Alpha1, Collagen Type I (Complex), Collagen Type I (Family), Collagen Type Iv, Collagen(S), Commd3-Bmi1, Crebzf, Cuzd1, Cxcl13, Dynll2, Ecm, Erk1/2, Fam102a, Fap, Fcer1, Fermt1, Fgf, Fgf13, Fgf16, Fgf6, Fgf7, Fgfr, Gas1, Gp6, Gpiib-iiia, Hcrt, Hedgehog, Hhat, Histone Deacetylase, Igsf3, Igsf8, Integrin, Itga3, Jink1/2, Laminin (Complex), Lfa-1, Loxl1, Lrig1, Mep1a, Myoc, Plc Gamma, Ppp1r15a, Rab5, Rap1, Rasgrp3, Rsk, Sh2d3c, Sharnin, Skap1, Slfn12l, Sox15, Srsf5, Talin, Tgf Beta, Tlr7/8, Ubiquitin Ligase, Ucn2, Wasf2, Wnt, Wnt8b, Zdhhc2                                                     |
| 5  | <ul style="list-style-type: none"> <li>Cell Cycle</li> <li>Developmental Disorder</li> <li>Endocrine System Disorders</li> </ul>                                              | 47 | 38 | Adaptor Protein, Adaptor Protein 2, Ap1s2, Ap2, Ap2 Alpha, Atn1, Beta Arrestin, Bmp15, Bok, Brms1l, Carboxylic Ester Hydrolase, Caspase, Caspase 3/7, Ccne2, Cdc2, Cdk, Cebpg, Ces, Ces1b/Ces1c, Ces1e, Ces4a, Cidec, Clathrin, Cpt1, Cyclin A, Cyclin D, Cyclin E, Dio1, Dynamamin, Dzip3, E2f, E2f1, Hdac, Histone H4, Jnk, Kcnab3, Map1lc3, Mxd1, N-Cor, Ncor1, Nr1h, Pctp, Pepck, Polr2m, Ptgds, Rar, Rb, Rhobtb3, Rnf165, Rprd1a, Rxr, Shisa5, Siah2, Slc29a2, Smad1/5/9, Smad2/3, Ston2, Swi-Snf, Tars2, Tbx1, Tespa1, Tfp2b, Thymidine Kinase, Tnfrsf14, Uck2, Ulk2, Unc13d, Vps50, Wars2, Wdr62                                                                                        |
| 6  | <ul style="list-style-type: none"> <li>Hematological System Development and Function</li> <li>Lymphoid Tissue Structure and Development</li> <li>Tissue Morphology</li> </ul> | 45 | 37 | Akt, Arfp2, C/Ebp, Cd180, Cd4, Chemokine, Chka, Cirbp, Cxcl16, Cytokine, Dsg1, Eif2ak2, Fcamr, Galnt1, Gm9573, Got, Grk6, Hk1, Ifn, Ifn Alpha/Beta, Ifn Beta, Ifnar, Iga, Ige, Igg, Igg1, Igg2a, Igg2b, Igg3, Igl1/Igl5, Igm, Ikb, Il1, Il12 (Complex), Il12 (Family), Il17d, Il36b, Immunoglobulin, Insrr, Interferon Alpha, Ly9, Mhc Class I (Complex), Mhc Class I (Family), Mhc Class II (Complex), Mhc II, Mliip, Mucin, Notch, Npas4, Pax5, Pdcd1lg2, Pro-Inflammatory Cytokine, Prr5, Rbm38, Reg3g, Saa3, Sema4b, Stat5a/B, Tlr, Tnf (Family), Tnfrsf17, Tnfsf12-Tnfsf13, Tnfsf13, Tnfsf15, Trem1, Trim59, Trpm4, Ugt2b17, Unc93b1, Vip                                                 |
| 7  | <ul style="list-style-type: none"> <li>Carbohydrate Metabolism</li> <li>Cell-To-Cell Signaling and Interaction</li> <li>Small Molecule Biochemistry</li> </ul>                | 45 | 37 | Abra, Adarb1, Adrb, Aldose Reductase, Alpha Tubulin, Ampa Receptor, Ampk, Ap1, Arf, Arhgap8/Prr5-Arhgap8, Bcr (Complex), C6, Calcineurin Protein(S), Camkii, Cd3, Clnk, Cofilin, Dock3, Epb4111, Erk, Ern2, Flrt3, Gadd45a, Gcsam, Gk, Gria2, Histone H1, Ica1, Inpp5, Inpp5a, Inpp5k, Isl1, Kiaa1522, Lrrc10, Map2k1/2, Mgst2, Miip, Mlc, Mtch1, Mthfd2, Nck, Nck1, Nfat (Complex), P70 S6k, Pak, Pak6, Pde, Pdgf (Complex), Pdgf Bb, Pfkfb3, Pp1 Protein Complex Group, Pp2a, Proinsulin, Rac, Rhov, Rock, Sapk, Scarb2, Scd, Slc6a3, Sos, Srsf7, Ssbp4, Synj1, Tra2b, Trmt6, Tyrosine Kinase, Ubp1, Unc5b, Vav                                                                              |
| 8  | <ul style="list-style-type: none"> <li>Energy Production</li> <li>Lipid Metabolism</li> <li>Small Molecule Biochemistry</li> </ul>                                            | 42 | 35 | 14-3-3, Adcy, Adcy8, Alkbh3, Asb9, Atypical Protein Kinase C, Bbox1, Casp2, Creb, Cyct, Cyp2c8, Cytochrome C, Enac, Estrogen Receptor, F2r1, G Protein, G Protein Alpha1, G Protein Beta Gamma, Gnai1, Growth Hormone, Gsk3, Gsq, Hdl-Cholesterol, Helt, Hsp27, Hsp70, Irs1, Kcnj1, Kik3, Klra7 (Includes Others), Knndc1, Ldl, Ldl-Cholesterol, Lh, Mek, Muc5b, Neurog2, Nfat (Family), Nqo1, Nr0b2, Nr1d1, Nr2e3, Nr4a2, P38 Mapk, P85 (Pik3r), Paqr7, Pde3b, Pex14, Pi3k (Complex), Pi3k (Family), Pi3k P85, Pkc(S), Pnpla2, Prkd1, Prss29, Prss50, Ptpase, Rara, Ras, Serine Protease, Sod, T3-Tr-Rxr, Tmem54, Tmprss11b, Tmprss7, Trypsin, Tsh, Ucp2, Ucp3, Voltage-Gated Calcium Channel |
| 9  | <ul style="list-style-type: none"> <li>Cancer</li> <li>Cell Cycle</li> <li>Cellular Development</li> </ul>                                                                    | 36 | 32 | Acetyl-L-Carnitine, Acox, Acox1, Adss1, Ankar, Bco1, Bpifb6, C1orf159, Catsperg, Ces3, Cholesterol, Chtop, Dec1, Egr2, Fabp9, Fgf13, Fuca1, Fyn, Hcn2, Heparin, Hnrpl, Hpd, Impg2, Inpp5a, Jpt2, Katnal1, Lrrc29, Lrtm1, Mir-100-5p (And Other Mirnas W/Seed Acccgua), Msl2, Mtmr11, Mup1 (Includes Others), Ncmap, Nfib, Nxph4, Obp2b, Ogdhl, Osbpl5, Pak6, Pctp, Pex2, Plekhg5, Pmm1, Pparg, Ppfia2, Ppp1ca, Ppp1r27, Ppp2r3d, Pstpip2, Ralgapa1, Rassf6, Rdh11, Rnf144b, Rorc, Shisa5, Shroom2, Slc16a14, Slc22a22, Slc22a25, Stard5, Tep1, Tex19.1, Tmem242, Tmem47, Tmem63a, Tmprss5, Tp53, Tpra1, Ubxn2b, Ywhaz                                                                          |
| 10 | <ul style="list-style-type: none"> <li>Cell Cycle</li> <li>Cellular Assembly and Organization</li> <li>DNA Replication, Recombination, and Repair</li> </ul>                  | 35 | 31 | Adal, Adamtsl3, Ammocr1, Amy2b, Arl5a, Asb15, Aspn, Aven, B4galnt3, C15orf39, Ccdc28a, Ccdc97, Cdc42se1, Cdh19, Cdr1, Ces2g, Cyp3a7, Ddx19a, Depdc7, Drtn, Fam83g, Fermt1, Il10ra, Iws1, Kiaa0408, Klhdc3, Krtap10-3, Meikin, Meox2, Mex3d, Mobp, N4bp3, Npm1, Nr3c1, Nxf1, P3h2, Pax1, Paxbp1, Pnoc, Rad21, Rad21l1, Rdh11, Rec8, Reg4, Rgs18, Rnf144b, Rpp25, Rpp40, Sectm1, Selenop, Slc16a11, Slc22a16, Stag3, Sycp3, Tbccd1, Tcf3, Terb1, Tgfb1, Tlr7, Tmem104, Tomm34, Tomm40l, Tpst2, Tsen54, Ubl4b, Vgll2, Vim, Xpo1, Znf544, Znf780a                                                                                                                                                  |

**F** **E 7.5** **6J Alcohol vs. Vehicle**

|   | Diseases and Functions                                                                                                                                          | -log(Fisher's exact p-value) | Molecules in Network | Molecules                                                                                                                                                                                                                                                                                                                                                                                                                                                                                                                                      |
|---|-----------------------------------------------------------------------------------------------------------------------------------------------------------------|------------------------------|----------------------|------------------------------------------------------------------------------------------------------------------------------------------------------------------------------------------------------------------------------------------------------------------------------------------------------------------------------------------------------------------------------------------------------------------------------------------------------------------------------------------------------------------------------------------------|
| 1 | <ul style="list-style-type: none"> <li>Dermatological Diseases and Conditions</li> <li>Lipid Metabolism</li> <li>Organismal Injury and Abnormalities</li> </ul> | 75                           | 70                   | A4galt, Abhd17b, Agtrap, Arl14ep, Aunip, Carmil2, Casq1, Casq2, Ccdc184, Ccdc89, Ctnnbip1, Daglb, Dolpp1, Eaf1, Ensa, Epb4115, Eri2, Extl1, Faf2, Fam114a1, Fam234a, Fbxo28, Gbx2, Gdf5, Gon7, Gpank1, Grb2, Grina, Hcn2, Hip1r, Ick, Inca1, Jsrp1, Kbtbd2, Klhdc3, Klhl36, Klk14, Lrrc8a, Lrrc8e, Lyg2, Map3k6, Ntf4, Pard6g, Pkp3, Plcd1, Plcd3, Plekho2, Pnma2, Pnma8a, Pop7, Ppp2r2d, Prap1, Prickle3, Rp111, Selenbp1, Snapc1, Snapc3, Spata2l, Stambpl1, Syt16, Tmem102, Ttyh2, Tulp1, Ubxn2a, Ubxn2b, Ubxn7, Ulk2, Vezt, Zfand2b, Zmym6 |

|    |                                                                                                                                                                           |    |    |                                                                                                                                                                                                                                                                                                                                                                                                                                                                                                                                                                                |
|----|---------------------------------------------------------------------------------------------------------------------------------------------------------------------------|----|----|--------------------------------------------------------------------------------------------------------------------------------------------------------------------------------------------------------------------------------------------------------------------------------------------------------------------------------------------------------------------------------------------------------------------------------------------------------------------------------------------------------------------------------------------------------------------------------|
| 2  | <ul style="list-style-type: none"> <li>– Cell Death and Survival</li> <li>– Cell Morphology</li> <li>– Cellular Compromise</li> </ul>                                     | 75 | 70 | Adat1, Anln, Anxa6, Anxa7, Atxn7l3b, C18orf54, C19orf44, Canx, Casd1, Ccdc127, Cdv3, Cipc, Dctd, Def6, Dpep3, Dynl1, Eed, Elavl1, Eml2, Fam76a, Fam83f, Gipc1, Gk5, Gpm6b, Gsn, Gvin1 (Includes Others), Hm13, Hpd1, Inpp1, Kcng3, Lgals3bp, Lmf1, Lrrc1, Lrtomt, Mfsd13a, Mkrn2os, Mob3a, Myo1c, Osgin2, Pafah1b1, Pcmt1d1, Pink1, Plekhg6, Proca1, Prrc1, Pskh1, Pwp2, Rbmx1, Rbmx2, Rbmxl1, Rbmxl2, Rdh13, Sfn, Slc50a1, Slc66a2, Smim14, Surf6, Thap3, Tmem189, Tmem53, Tmem68, Trim14, Trim25, Ttc7a, Uros, Vim, Wdr41, Ywhah, Zbtb41, Zfx, Znf354b, Znf91                |
| 3  | <ul style="list-style-type: none"> <li>– Cancer</li> <li>– Connective Tissue Disorders</li> <li>– Organismal Injury and Abnormalities</li> </ul>                          | 72 | 69 | Arl8a, Arpc1b, Cd101, Cenpb, Clrn1, Cmb1, Cntn2, Col11a1, Col4a5, Col8a1, Collagen, Ctsf, Dhrr7b, Dnlz, Errf1, Esyt1, Fam13b, Fbxl2, Foxl1, Hells, Hydin, Jagn1, Kiaa0930, Klhl21, Klhl26, Me1, Metap1, Mllt10, Mxd3, Mxi1, Naa16, Naa40, Nars1, Ndufaf4, Nfxl1, Nol9, Nrp1, Pdrgr1, Pef1, Pogk, Polr2m, Ppp1r16a, Puf60, Pxn, Rabggtb, Rbm22, Rcbtb2, Rfwd3, Ripk4, Rmnd5b, Rnf146, Rnf19b, Rpusd1, Samhd1, Sema6c, Smarcd1, Tmpo, Topors, Tram2, Trim31, Tspan11, Ube2d4, Ubox5, Ubtd1, Vwa1, Wars2, Ypel5, Zfp42, Zg16, Zmynd19                                             |
| 4  | <ul style="list-style-type: none"> <li>– Cancer</li> <li>– Organismal Injury and Abnormalities</li> <li>– RNA Post-Transcriptional Modification</li> </ul>                | 67 | 67 | Abi2, Adal, Ai987944 (Includes Others), Atg16l1, Atp11b, Bricd5, Cbx1, Cbx5, Cebp, Coil, Cxnc1, Dazap1, Dedd2, Dhx15, Efh2, Fgf17, Grwd1, Hebp2, Histone H3, Hnrnpk, Hoxa9, Hp1bp3, Igsf8, Ilf2, Itga4, Kank3, Krt7, Lmna, Lsm2, Lsm6, Magea3 (Includes Others), Maged2, Mmd2, Pcid2, Pou2f3, Ppp4r2, Prpf38b, Ptgr1, Ptrhd1, Rbbp5, Rbm18, Riox2, Rnpc3, Rpl27a, Shmt2, Slc35a4, Smndc1, Snrnp, Snrpd1, Syng1, Tada1, Tcpl111, Thoc1, Tmem14a, Tmem203, Tmem267, Tmem42, Tmem54, Tmem86a, Trappc13, Tuba4a, U1 Snrnp, Ubn1, Wsb1, Yipf6, Zfp1, Znf22, Znf280d, Znf623, Znf688 |
| 5  | <ul style="list-style-type: none"> <li>– Cellular Assembly and Organization</li> <li>– Cellular Function and Maintenance</li> <li>– Infectious Diseases</li> </ul>        | 65 | 66 | Alg2, Ano10, Arfgap2, Arrdc1, Atf1, Bc048679, Cdc42ep2, Cenpn, Crim1, Dbr1, Escrt1, Esr1, Fam118a, Fam136a, Fdxacb1, Fibp, Fkbp1b, Gatb, Gc-Gcr Dimer, Gjd3, Hacd1, Hnf4g, Ica1, Kcnq4, Kctd17, Lor, Micu3, Mier1, Miip, Mkks, Mob3c, Ncoa7, Npw, Nsd1, Nup35, Paqr4, Pcdhb14, Pcdhb4, Peptidylprolyl Isomerase, Plscr3, Plxdc1, Pnrc1, Pnrc2, Ppwd1, Prr15l, Pus1, Qrs1, Rar, Rarg, Rnf138, Rnf38, Sec22c, Shroom1, Slc44a2, Slco1c1, Stk16, Tfp2c, Them6, Tjp3, Trim47, Tsg101, Ttc9, Vps37a, Vps37b, Vps37d, Wdr4, Xpnpep1, Ypel3, Zdhhc21, Zfand4                          |
| 6  | <ul style="list-style-type: none"> <li>– Embryonic Development</li> <li>– Organ Development</li> <li>– Organismal Development</li> </ul>                                  | 65 | 66 | Actc1, Actr1a, Aipl1, Ankrd34c, Atf7, Atpase, Borcs6, Borcs8, Ccdc8, Dctn2, Dtnbp1, Eif3j, Entpd1, Fbxo25, Fgfr1op, Foxc1, Gemin2, Gins1, Haus8, Hnrnp1, Jdp2, Kcnab3, Kiaa0753, Kiz, Krt16, Kti12, Mab21l3, Mb21d2, Med4, Mettl3, Mphosph9, Myh14, Myo18b, N4bp3, Ncbp2, Nlrp10, Nop2, Odf2l, P Glycoprotein, Panx1, Par, Patz1, Pfkp, Phax, Prickle2, Psmc5, Rhof, Sec31b, Shtn1, Snw1, Sorbs1, Spats2, Spdl1, Swsap1, Tcf15, Tcp1, Tcp11l2, Thg1l, Tnni3k, Tnnt2, Tor1aip1, Tor1b, Trap/Media, Txndc9, Usp9x, Vill, Wtap, Yap1, Znf326, Znf524                              |
| 7  | <ul style="list-style-type: none"> <li>– Developmental Disorder</li> <li>– Hereditary Disorder</li> <li>– Post-Translational Modification</li> </ul>                      | 63 | 65 | Amigo1, Asl, Atp8b2, Azin2, B3gnt3, B4galnt1, B4gat1, Btdb10, Btd, C1ql1, Ccdc106, Cd160, Cers4, Chodl, Cntnap3, Cryl1, Dtdw1, Ethe1, Evx1, Ext1, Fbxo2, Fev, Fktn, Fos, Galnt12, Gpha2, Gpt2, Has, Hus1, Interleukin, Kiaa1841, Klrg2, Lamb2, Lonrf2, Lrif1, Mad2l2, Metr, Mob4, Mto1, Nagpa, Nkiras2, Ornithine Decarboxylase, Pcdh19, Pdf, Ppp2c, Prrx1, Ptcd2, Pxx, Rmnd1, Rtn2, Scf, Sgtb, Sike1, Slc10a6, Slc25a20, Smg7, Smg8, Snai3, Snx25, St6galnac4, St8sia3, St8sia5, Stk25, Strn3, Tbp1, Tmem143, Tmem30b, Tpgs1, Xylt1, Znf146                                   |
| 8  | <ul style="list-style-type: none"> <li>– Cell Morphology</li> <li>– Post-Translational Modification</li> <li>– Small Molecule Biochemistry</li> </ul>                     | 63 | 65 | Agfg2, Angel1, Aplp1, Atic, Atxn7l2, C1orf35, Ccdc122, Cdy12, Chst13, Clock, Col9a2, Cspp1, Dennd2d, Dis3l, Epc1, Epc2, Eps15, Etv2, Exosc6, Exosc7, Exosome, Fez1, Fgf16, Foxn2, Foxo6, G2e3, Gcdh, Gnl1, Hap1, Hid1, Hmgcs2, Hoxb8, Hs3st3a1, Ing3, Ing5, Katnbl1, Meaf6, Med23, Mipol1, Mis12, Mphosph6, Nuf2, Paps2, Pdcd7, Pkdcc, Pkn3, Plvap, Pnp, Pxr Ligand-Pxr-Retinoic Acid-Rxr, Rbm48, Rcn3, Reep3, Sec62, Sgf29, Slc25a41, Spc24, Specc1l, Srcap, Stx18, Sulfoltransferase, Sult1d1, Sult1e1, Thap11, Tip60, Vegf, Vps51, Yeats4, Znf24, Znf324, Znf394            |
| 9  | <ul style="list-style-type: none"> <li>– Digestive System Development and Function</li> <li>– Embryonic Development</li> <li>– Post-Translational Modification</li> </ul> | 63 | 65 | Abhd8, Ahcyl2, Ammecn1, Anapc16, Arhgap45, Armc5, Banp, Bcap29, Bend3, Bmt2, Ccng1, Ccnl2, Cdx4, Cfap97, Chp1, Cog8, Dip2a, Fam117a, Fam124a, Fam161a, Fam214b, Farnesyl Transferase, Fnta, Gabp, Gabpb1, Gata, Gem, Ggtase I, Gmip, Hectd1, Hmbox1, Homer2, Iffo1, Irf2bp2, Irx5, Isl1, Itfg2, Lhx6, Lmo1, Lmo2, Lmo4, Loc728392, Lrnf4, Mbnl1, Meis2, Mnx1, Necap2, Nova1, Nudt22, Ooep, Pars2, Pgggt1b, Pitx1, Proser2, Purg, Ras, Rundc3a, Ssbp4, Suox, Tal2, Tle6, Trim54, Uba6, Uck1, Vmac, Wdr33, Zbtb43, Zdhhc1, Znf513, Zzz3                                          |
| 10 | <ul style="list-style-type: none"> <li>– Cell Morphology</li> <li>– Cellular Assembly and Organization</li> <li>– Protein Synthesis</li> </ul>                            | 63 | 65 | Adck5, Adss1, Appl2, Atm/Atr, Azin1, Chdh, Cpne7, Crif3, Cxcl12, Dcaf15, Dtdw2, Eme2, Etaa1, Fa, Faap24, Fanc, Fanc, Fance, Gls, Grpel2, Grsf1, Gsap, Hoga1, Iba57, Id4, Lman2l, Mapre3, Mepce, Mfap3, Mgme1, Mmadhc, Mrm3, Mrn, Mrpl19, Mrpl21, Mrpl32, Mrpl39, Mrpl44, Mrpl45, Mrpl49, Mrpl9, Mrps25, Mrps27, Mrps30, Mrps7, Nit1, Oxld1, Pagr1, Psrc1, Rab31, Rmi2, Rpa, Rpusd3, Rpusd4, Sertad3, Slx1a/Slx1b, Slx4ip, Susd1, Tmc4, Tmco4, Tmem231, Tmem245, Top3a, Tra2a, Trmt1, Wfdc1, Xrcc2, Yars2, Ybey, Znf503                                                         |

**G** E 7.5 6N Alcohol vs. Vehicle

| Diseases and Functions | -log(Fisher's exact <i>p</i> -value) | Molecules in Network | Molecules |
|------------------------|--------------------------------------|----------------------|-----------|
|------------------------|--------------------------------------|----------------------|-----------|



|   |                                                                                                                                                                               |    |    |                                                                                                                                                                                                                                                                                                                                                                                                                                                                                                                                                                                                                                                                                                        |
|---|-------------------------------------------------------------------------------------------------------------------------------------------------------------------------------|----|----|--------------------------------------------------------------------------------------------------------------------------------------------------------------------------------------------------------------------------------------------------------------------------------------------------------------------------------------------------------------------------------------------------------------------------------------------------------------------------------------------------------------------------------------------------------------------------------------------------------------------------------------------------------------------------------------------------------|
| 1 | <ul style="list-style-type: none"> <li>– Cell Morphology</li> <li>– Embryonic Development</li> <li>– Hair and Skin Development and Function</li> </ul>                        | 70 | 49 | 26s Proteasome, Adgrg6, Azin2, Calmodulin, Col4a6, Complement, Cxcr6, Dmc1, Dnajc6, Etv1, Fam222a, Fbn2, Fbxo6, Fpr1, Hemgn, Hnrnpk, Hspd1, Igg1, Igm, Il12 (Complex), Il12 (Family), Il1bos, Iqcb1, Kcnn1, Kcnn2, Keratin, Klhl22, Kpnb1, Krt16, Krt26, Krt33a, Krt35, Krt37, Krt73, Krt75, Krt86, Kyat1, Lgals3bp, Mapk, Mkrn3, Ndufa4l2, Noa1, Notch2, Notch3, Ornithine Decarboxylase, P-Tefb, Pbx1, Proinsulin, Pspc1, Ras, Rbm14, RbmX, Rna Polymerase Ii, Sdr39u1, Sfpq, Sil1, Six2, Slc25a20, Speg, Sstr4, Stat, Syt2, Tbx19, Tcea2, Trim28, Trim31, Tuba4a, Tubulin, Ubr1, Znf462                                                                                                             |
| 2 | <ul style="list-style-type: none"> <li>– Cardiovascular Disease</li> <li>– Cell Death and Survival</li> <li>– Cellular Assembly and Organization</li> </ul>                   | 70 | 49 | Adss1, Ak1, Ankrd37, Aven, Ccdc155, Ccnjl, Cga, Cldn13, Coq8b, Dio2, Dnpep, EglN, Fcn1, Fhl2, Gata2, Gmppa, Gpr158, Gpr25, Gpr37l1, Hebp2, Hmx1, Hnrnp1, Hnrmpu, Htr3b, Igsf9, Krtcap3, Kyat3, Lhfp15, Lrrc57, Lyg2, Maml2, Marchf2, Mkrn2os, Morn1, Mtnr1b, Nanos2, Nr3c1, Nsg1, Nudt13, Odf4, Pdzph1, Pitx2, Prss56, Ptgr1, RetnlG, Rhag, Rhce/Rhd, RhoX3a (Includes Others), Rnf122, Rtn4r1, Scube1, Selenbp1, Serp2, Serpinb9f (Includes Others), Serpin2, Slc44a4, Smim14, Sox13, Spire2, Stag3, Stfa2/Stfa2l1, Syng1, Terb1, Tgfb1, Trim25, Trim58, Ubc, Upk3b, Wdpcp, Wdr34                                                                                                                     |
| 3 | <ul style="list-style-type: none"> <li>– Lipid Metabolism</li> <li>– Nucleic Acid Metabolism</li> <li>– Small Molecule Biochemistry</li> </ul>                                | 58 | 43 | Acss2, Acvr2b, Alp, Alpl, Ampk, Bcl11a, Bmp15, Bspry, Calcineurin Protein(S), Caspase 3/7, Cbp/P300, Ccnd2, Collagen Alpha1, Ctbp, Cuedc2, Cyclin A, Cyp11a1, Cyp2c40 (Includes Others), Cyp2c8, Cyp2e1, Cyp4f11, Dkk1, Elovl6, Emid1, Etv6, Fasn, Frizzled, Fsh, Gzmh, Hdac, Histone H3, Histone H4, Hsp70, Jnk, Kat2b, Khk, Lmcd1, Mef2, Mef2c, Mgmt, Mlycd, N-Cor, Nadh2 Or Nadph2 1 Atom Incorporation:Oxygen Oxidoreductase, Ncs1, Nr1h, P70 S6k, Prc2, Prkag2, Proc, Qki, Rab29, Rb, Rbm15, Sat2, Scd2, Six3, Smad, Smad2/3, Sp7, Tcf, Tgf Beta, Tgm2, Tnfrsf14, Tnn, Tp63, Trerf1, Unspecific Monooxygenase, Vgl12, Vill, Wnt1                                                                  |
| 4 | <ul style="list-style-type: none"> <li>– Cellular Movement</li> <li>– Hematological System Development and Function</li> <li>– Post-Translational Modification</li> </ul>     | 58 | 43 | 2210010c04rik, Abl1, Adam22, Alpha 1 Antitrypsin, Ap1, Arrdc1, Atp6v1g3, Blvrb, Calpain, Caspase, Cd44, Cilp, Ck2, Cog8, Crabp2, Cstf3, Ctla2a/Ctla2b, Cytochrome C, Cytokine, Dsg1, Ecm, Efna4, Entpd1, F9, Focal Adhesion Kinase, Gbe1, Gcdh, Gsk3, H2ax, Histone, Hnrmpa1, Hnrmpdl, Hsp90, Il1r2, Immunoglobulin, Interleukin, Klk12, Lanc12, Ldb1, Ldl, Macrod1, Mdn1, Metalloprotease, Micb, Mmp, Mmp2, Necap2, P Glycoprotein, P38 Mapk, Parp, Phosphatase, Pink1, Pkc(S), Plppr3, Prap1, Prickle3, Prkch, Prss50, Prss56, Serine Protease, Sgca, Shp, St3gal2, Stx4, Tet1, Trypsin, Ubiquitin, Usp17le (Includes Others), Utp20, Vegf                                                           |
| 5 | <ul style="list-style-type: none"> <li>– Developmental Disorder</li> <li>– Organismal Injury and Abnormalities</li> <li>– Skeletal and Muscular Disorders</li> </ul>          | 54 | 41 | Alpha Actinin, Amylase, Anxa4, Bmp, C3, Camk1, Cd55, Cd68, Cdh11, Cer1, Chst3, Chymotrypsin, Col10a1, Collagen Type I (Complex), Collagen Type Ii, Collagen Type Iii, Collagen Type Iv, Collagen Type V, Collagen Type X, Collagen(S), Complement Component 1, Cpa1, Cr3, Elastase, Erk1/2, Etv2, Fbx12, Fgf, Fgf13, Fibrin, Fibrinogen, Gli, Gli3, Glipr2, Hcrt, Hgh1, Hopx, Hs6st2, Inpp1, Integrin, Klf13, Klrc1, Laminin (Complex), Lrg1, Mmp8, Nkx2-5, Pdgf (Complex), Pla2, Pla2g5, Pld, Pld2, Prrx1, Pxr Ligand-Pxr-Retinoic Acid-Rxra, Rab26, Rab3d, Rgs5, Rps6ka, Rsph6a, Serpinb7, Ski, Slco1b3, Smooth Muscle Actin, Sox17, St6galnac3, Sulfotransferase, Sult1e1, Tbx1, Ubash3a, Ucn3, Wnt |
| 6 | <ul style="list-style-type: none"> <li>– Cellular Movement</li> <li>– Hematological System Development and Function</li> <li>– Immune Cell Trafficking</li> </ul>             | 52 | 40 | Ackr2, Acox, Acy1, Akt, Asb9, Atrial Natriuretic Peptide, Ccl1, Ccl22, Ccl24, Ccl7, Ccng1, Collagen Type I (Family), Cox6a2, Creatine Kinase, Creb3l3, Ctla4, Cxcl13, Cxcl3, Cyp7a1, Dbh, Dynammin, Fcer1, Fgd2, Foxp1, Gdf15, Guca1a, Hfe, Ige, Il-2r, Il17r, Il17rc, Il23, Il2rb, Jak, Jink1/2, Jun/Junb/Jund, Laminin1, Loc102724788/Prodh, Lpin1, Map2k1/2, Marco, Mcam, Mek, Mir122a, B, Nfatc4, Or51e2, Pi3k (Family), Pi3k P85, Pik3c2g, Plac8, Plk3, Ppp2c, Prcp, Raf, Rap1, Rar, Reg3a, Rsk, Rxr, Rxrg, S100, S100a4, S100a8, S100a9, Scgb3a1, Serpinb6b, Slc6a12, T3-Tr-Rxr, Thyroid Hormone Receptor, Vla-4                                                                                 |
| 7 | <ul style="list-style-type: none"> <li>– Endocrine System Development and Function</li> <li>– Inflammatory Response</li> <li>– Organismal Injury and Abnormalities</li> </ul> | 52 | 40 | 2' 5' Oas, 9830107b12rik/A530064d06rik, Alb, Aldh, Apyrase, Aqp5, C/Ebp, Capg, Cd200r1, Cd209c, Cd276, Chemokine, Collagen, Cspg4, Cyp1a1, Cytokine Receptor, Elf3, Filamin, Fuca1, Gadd45b, Nggt1, Growth Hormone, Hat, Hdl, Hif1, Hp, Ifn, Ifn Beta, Ifna4, Ifnar, Il1, Il36g, Il36m, Interferon Alpha, Krtap11-1, Lcn2, Ldl-Cholesterol, Mapk13, Mhc Class Ii (Complex), Mus81, Nap1l2, Nfkb (Complex), Nlr, Nlrp4, Nlrp6, Notch, Oas, Oas1, Oas1b, Oas1d (Includes Others), Pepck, Polr3gl, Pro-Inflammatory Cytokine, Prtn3, Rras, Sapk, Setbp1, Slc46a2, Ssbp4, Stap2, Tgfbr, Tlr, Tnf (Family), Tnfrsf17, Tnfsf8, Ugt, Ugt2a1, Ugt2b17, Unc93b1, Vcan                                           |
| 8 | <ul style="list-style-type: none"> <li>– Cancer</li> <li>– Organismal Injury and Abnormalities</li> <li>– Psychological Disorders</li> </ul>                                  | 50 | 39 | Adcy, Adrb, Akr1b7, Anxa9, Ap2, Bace1, Bcas1, Bco1, Beta Arrestin, Blk, Cadm4, Cg, Creb, Estrogen Receptor, Fam3d, Fhl5, Flot1, Foxo6, G Protein AlphaI, Gabrg2, Gimap8, Gipc1, Gnao1, Gnat3, Got, Gpcr, Hnrnp1, Htr1a, Igf2bp3, Insulin, Kcnj1, Kdr, Kiss1r, Ldh (Complex), Lh, Mediator, Nefm, Neurod2, Ntrk3, P85 (Pik3r), Pcyt1b, Pdgr, Pi3k (Complex), Pka, Pka Catalytic Subunit, Plc, Pp2a, Ppm1j, Ppy, Ptpase, Ptpn1, Ptpn18, Rassf2, Ros1, Sfk, Shc, Sod, Src (Family), Srxn1, Stat5a/B, Trh, Trk Receptor, Tro, Tsh, Tspo, Tubb4a, Tubulin (Family), Voltage-Gated Calcium Channel, Ypel3, Znf326                                                                                            |

|    |                                                                                                                                                                                             |    |    |                                                                                                                                                                                                                                                                                                                                                                                                                                                                                                                                                                                                                                          |
|----|---------------------------------------------------------------------------------------------------------------------------------------------------------------------------------------------|----|----|------------------------------------------------------------------------------------------------------------------------------------------------------------------------------------------------------------------------------------------------------------------------------------------------------------------------------------------------------------------------------------------------------------------------------------------------------------------------------------------------------------------------------------------------------------------------------------------------------------------------------------------|
| 9  | <ul style="list-style-type: none"> <li>– Cellular Function and Maintenance</li> <li>– Cellular Growth and Proliferation</li> <li>– Hematological System Development and Function</li> </ul> | 43 | 35 | <p>Acr, Actin, Alpha Catenin, Alpha Tubulin, Arhgap9, Arhgef2, Bach2, Bcr (Complex), Camkii, Cap2, Cblc, Cd207, Cd3, Cofilin, Ctnna3, Eps8l2, Erk, Erm, F Actin, Frs3, Gcsam, Gm9573, Gmpr, Grik5, Gsn, H2-L, H2-M10.1 (Includes Others), Hla-A, Hla-G, Iga, Igg, Igg2a, Igg3, Iqub, Itgad, Jph4, Kcna5, Klra7 (Includes Others), Mapk15, Mhc, Mhc Class I (Complex), Mhc Class I (Family), Mlc, Mucin, Myosin, NADPH Oxidase, Nfat (Complex), Nfat (Family), Pak, Pdgf Bb, Plc Gamma, Ptk, Rab11, Rac, Rac3, Ras Homolog, Rhoc, Rnd2, Rock, Sec14l1, Serpinb10, Sos, Sptbn4, St8sia3, Tap, Tappb, Tcr, Tesk1, Trio, Tyrosine Kinase</p> |
| 10 | <ul style="list-style-type: none"> <li>– Cell Death and Survival</li> <li>– DNA Replication, Recombination, and Repair</li> <li>– Nervous System Development and Function</li> </ul>        | 41 | 34 | <p>Acss2, Acy3, Adra2b, Aoc1, Apoc3, Asl, Bmper, Bpifb2, C11orf71, Calcl, Ccer1, Ccr5, Ces2e, Cst9l, Cxcr6, Cyp2a12/Cyp2a22, Depp1, Dhx29, Dmc1, Fgf13, Fxyd6, Fxyd7, Fzd3, Fzd6, Gchfr, Gdpd4, Gpr37, Gpr37l1, Hdl-Cholesterol, Hipk1, Hnf4a, Ikzf2, Il10ra, Impg1, Kcnk3, Krt8, Loc102724788/Prodh, Map3k8, Mutyh, Mycn, Ndr4, Npffr2, Npm1, Npnt, Nrarp, Nynrin, Plscr1, Prkcz, Rhox6/Rhox9, Rnase4, Sdr42e1, Sh3bgrl2, Slc10a5, Slc39a2, Sox2, Speer4a (Includes Others), Sprr2h, Sprr2i, Sstr4, Sycn, Tada1, Tapppl, Tet1, Tex15, Tm6sf1, Tp53, Unc5a, Urah, Yy2, Zic3</p>                                                          |



**Table S3. Selected pathways significantly enriched among differentially expressed genes between the vehicle-treated 6J and 6N embryos 6 hr after injection (E7.25).****Down-regulated Genes****Gene Ontology: Biological Process**

| Term name                             | Term ID    | # of genes | Log10 <i>p</i> -value |
|---------------------------------------|------------|------------|-----------------------|
| Cytolysis                             | GO:0019835 | 7          | 5.12                  |
| Granzyme-mediated apoptotic signaling | GO:0008626 | 5          | 4.85                  |

**Gene Ontology: Molecular Function**

| Term name                                                    | Term ID    | # of genes | Log10 <i>p</i> -value |
|--------------------------------------------------------------|------------|------------|-----------------------|
| Serine-type endopeptidase activity                           | GO:0004252 | 11         | 4.30                  |
| Hydrolase activity, acting on acid phosphorus-nitrogen bonds | GO:0016825 | 11         | 3.80                  |
| Serine hydrolase activity                                    | GO:0017171 | 11         | 3.80                  |
| Peptidase activity                                           | GO:0008233 | 16         | 2.18                  |
| Peptidase activity, acting on L-amino acid peptides          | GO:0070011 | 15         | 1.79                  |

**KEGG: Biological Process**

| Term name                               | Term ID    | # of genes | Log10 <i>p</i> -value |
|-----------------------------------------|------------|------------|-----------------------|
| Graft-versus-host disease               | KEGG:05332 | 5          | 2.71                  |
| cAMP signaling                          | KEGG:04024 | 9          | 2.68                  |
| Neuroactive ligand-receptor interaction | KEGG:04080 | 10         | 1.84                  |

**Reactome**

| Term name                                                           | Term ID           | # of genes | Log10 <i>p</i> -value |
|---------------------------------------------------------------------|-------------------|------------|-----------------------|
| Activation, myristoylation of BID and translocation to mitochondria | REAC:R-MMU-75108  | 5          | 5.59                  |
| Intrinsic pathway for apoptosis                                     | REAC:R-MMU-109606 | 5          | 2.63                  |

**Up-regulated Genes****KEGG: Biological Process**

| Term name           | Term ID    | # of genes | Log10 <i>p</i> -value |
|---------------------|------------|------------|-----------------------|
| Caffeine metabolism | KEGG:00232 | 2          | 1.94                  |

**Table S4. Selected pathways significantly enriched among differentially expressed genes between the 6J and 6N embryos 12 hr after vehicle treatment (E7.5).****Down-regulated Genes****Gene Ontology: Molecular Function**

| Term name                                                    | Term ID    | # of genes | Log10 <i>p</i> -value |
|--------------------------------------------------------------|------------|------------|-----------------------|
| Serine-type endopeptidase activity                           | GO:0004252 | 9          | 2.62                  |
| Serine-type peptidase activity                               | GO:0008236 | 9          | 2.30                  |
| Hydrolase activity, acting on acid phosphorus-nitrogen bonds | GO:0016825 | 9          | 2.22                  |
| Serine hydrolase activity                                    | GO:0017171 | 9          | 2.22                  |
| Endopeptidase activity                                       | GO:0004175 | 12         | 1.60                  |

**Up-regulated Genes****Reactome**

| Term name                            | Term ID      | # of genes | Log10 <i>p</i> -value |
|--------------------------------------|--------------|------------|-----------------------|
| Peptide ligand-binding receptors     | R-MMU-375276 | 7          | 2.74                  |
| GPCR ligand binding                  | R-MMU-500792 | 9          | 2.58                  |
| Class A/1 (Rhodopsin-like receptors) | R-MMU-373076 | 8          | 2.42                  |

**Human Phenotype Ontology**

| Term name                                          | Term ID    | # of genes | Log10 <i>p</i> -value |
|----------------------------------------------------|------------|------------|-----------------------|
| Hyperprostaglandinuria                             | HP:0003527 | 2          | 1.93                  |
| Increased serum prostaglandin E2                   | HP:0003566 | 2          | 1.93                  |
| Renal juxtaglomerular cell hypertrophy/hyperplasia | HP:0000111 | 2          | 1.93                  |
| Abnormal circulating prostaglandin circulation     | HP:0011023 | 2          | 1.93                  |

**Table S5. Selected pathways significantly enriched among differentially expressed genes between the PAE and vehicle-treated 6J embryos 6 hr after exposure (E7.25).****Down-regulated Genes****Gene Ontology: Biological Process**

| Term name                          | Term ID    | # of genes | Log10 <i>p</i> -value |
|------------------------------------|------------|------------|-----------------------|
| Cellular metabolic process         | GO:0044237 | 275        | 10.45                 |
| Gene expression                    | GO:0010467 | 162        | 6.44                  |
| Methylation                        | GO:0032259 | 27         | 5.47                  |
| Protein modification process       | GO:0036211 | 119        | 4.32                  |
| Cell cycle                         | GO:0007049 | 66         | 3.91                  |
| Cellular biosynthetic process      | GO:0044249 | 154        | 2.96                  |
| RNA modification                   | GO:0009451 | 14         | 2.69                  |
| Chromosome organization            | GO:0051276 | 45         | 1.73                  |
| Programmed cell death              | GO:0012501 | 65         | 1.43                  |
| Transcription by RNA polymerase II | GO:0006366 | 66         | 1.39                  |

**Gene Ontology: Molecular Function**

| Term name                        | Term ID    | # of genes | Log10 <i>p</i> -value |
|----------------------------------|------------|------------|-----------------------|
| Heterocyclic compound binding    | GO:1901363 | 172        | 7.10                  |
| Methyltransferase activity       | GO:0008168 | 19         | 4.81                  |
| Catalytic activity               | GO:0003824 | 159        | 3.24                  |
| Nucleic acid binding             | GO:0003676 | 110        | 3.05                  |
| Enzyme binding                   | GO:0019899 | 76         | 2.66                  |
| ATP binding                      | GO:0005524 | 55         | 2.57                  |
| Protein binding                  | GO:0005515 | 241        | 2.51                  |
| miRNA binding                    | GO:0035198 | 6          | 1.83                  |
| Ribonucleotide binding           | GO:0032553 | 64         | 1.82                  |
| transcription regulator activity | GO:0140110 | 49         | 1.31                  |

**Human Phenotype Ontology**

| Term name      | Term ID    | # of genes | Log10 <i>p</i> -value |
|----------------|------------|------------|-----------------------|
| Broad forehead | HP:0000337 | 13         | 2.57                  |

**Up-regulated Genes****Gene Ontology: Biological Process**

| <b>Term name</b>                      | <b>Term ID</b> | <b># of genes</b> | <b>Log10 <i>p</i>-value</b> |
|---------------------------------------|----------------|-------------------|-----------------------------|
| Cytolysis                             | GO:0019835     | 9                 | 5.53                        |
| Granzyme-mediated apoptotic signaling | GO:0008626     | 5                 | 3.19                        |
| Primary alcohol metabolic process     | GO:0034308     | 8                 | 1.69                        |

**Gene Ontology: Molecular Function**

| <b>Term name</b>                                             | <b>Term ID</b> | <b># of genes</b> | <b>Log10 <i>p</i>-value</b> |
|--------------------------------------------------------------|----------------|-------------------|-----------------------------|
| Serine-type endopeptidase activity                           | GO:0004252     | 12                | 2.14                        |
| Endopeptidase activity                                       | GO:0004175     | 19                | 1.93                        |
| Hydrolase activity, acting on acid phosphorus-nitrogen bonds | GO:0016825     | 12                | 1.66                        |
| Serine hydrolase activity                                    | GO:0017171     | 12                | 1.66                        |

**KEGG: Biological Process**

| <b>Term name</b>          | <b>Term ID</b> | <b># of genes</b> | <b>Log10 <i>p</i>-value</b> |
|---------------------------|----------------|-------------------|-----------------------------|
| Graft-versus-host disease | KEGG:05332     | 5                 | 1.38                        |

**Reactome**

| <b>Term name</b>                                                    | <b>Term ID</b>   | <b># of genes</b> | <b>Log10 <i>p</i>-value</b> |
|---------------------------------------------------------------------|------------------|-------------------|-----------------------------|
| Activation, myristoylation of BID and translocation to mitochondria | REAC:R-MMU-75108 | 5                 | 4.08                        |

**Table S6. Selected pathways significantly enriched among differentially expressed genes between the PAE and vehicle-treated 6N embryos 6 hr after exposure (E7.25).****Down-regulated Genes****Gene Ontology: Biological Process**

| <b>Term name</b>                         | <b>Term ID</b> | <b># of genes</b> | <b>Log10 p-value</b> |
|------------------------------------------|----------------|-------------------|----------------------|
| Organic substance metabolic process      | GO:0071704     | 179               | 3.38                 |
| Macromolecule metabolic process          | GO:0043170     | 159               | 3.01                 |
| Primary metabolic process                | GO:0044238     | 171               | 2.98                 |
| Methylation                              | GO:0032259     | 18                | 2.71                 |
| Metabolic process                        | GO:0008152     | 182               | 2.27                 |
| Macromolecule methylation                | GO:0043414     | 16                | 2.17                 |
| Regulation of metabolic process          | GO:0019222     | 119               | 1.71                 |
| Nitrogen compound metabolic process      | GO:0006807     | 159               | 1.68                 |
| RNA metabolic process                    | GO:0016070     | 87                | 1.67                 |
| Regulation of cellular metabolic process | GO:0031323     | 111               | 1.44                 |

**Gene Ontology: Molecular Function**

| <b>Term name</b>                          | <b>Term ID</b> | <b># of genes</b> | <b>Log10 p-value</b> |
|-------------------------------------------|----------------|-------------------|----------------------|
| rRNA (adenine) methyltransferase activity | GO:0016433     | 3                 | 1.74                 |
| Catalytic activity                        | GO:0003824     | 107               | 1.62                 |
| Sterol esterase activity                  | GO:0004771     | 4                 | 1.50                 |
| Methyltransferase activity                | GO:0008168     | 11                | 1.35                 |

**Reactome**

| <b>Term name</b>                | <b>Term ID</b> | <b># of genes</b> | <b>Log10 p-value</b> |
|---------------------------------|----------------|-------------------|----------------------|
| Gene expression (transcription) | R-MMU-74160    | 29                | 1.78                 |
| RNA polymerase II transcription | R-MMU-73857    | 27                | 1.73                 |

**Table S7. Selected pathways significantly enriched among differentially expressed genes between the PAE and vehicle-treated 6J embryos 12 hr after exposure (E7.5).****Down-regulated Genes****Gene Ontology: Biological Process**

| <b>Term name</b>                         | <b>Term ID</b> | <b># of genes</b> | <b>Log10 p-value</b> |
|------------------------------------------|----------------|-------------------|----------------------|
| Nucleic acid metabolic process           | GO:0090304     | 552               | 69.99                |
| Gene expression                          | GO:0010467     | 559               | 57.57                |
| Primary metabolic process                | GO:0044238     | 819               | 45.95                |
| Embryo development                       | GO:0009790     | 136               | 13.2                 |
| Heart development                        | GO:0007507     | 77                | 7.33                 |
| Skeletal system development              | GO:0001501     | 66                | 6.40                 |
| Cellular response to DNA damage stimulus | GO:0006974     | 82                | 4.75                 |
| Regulation of cell cycle                 | GO:0051726     | 100               | 4.02                 |
| Circulatory system development           | GO:0072359     | 108               | 3.84                 |
| Brain development                        | GO:0007420     | 76                | 3.40                 |

**Gene Ontology: Molecular Function**

| <b>Term name</b>                   | <b>Term ID</b> | <b># of genes</b> | <b>Log10 p-value</b> |
|------------------------------------|----------------|-------------------|----------------------|
| Nucleic acid binding               | GO:0003676     | 432               | 54.31                |
| Organic cyclic compound binding    | GO:0097159     | 550               | 40.57                |
| DNA binding                        | GO:0003677     | 266               | 33.72                |
| RNA binding                        | GO:0003723     | 156               | 18.46                |
| Transcription factor binding       | GO:0008134     | 88                | 9.27                 |
| Catalytic activity, acting on RNA  | GO:0140098     | 55                | 7.99                 |
| Histone acetyltransferase activity | GO:0004402     | 14                | 2.62                 |
| Protein binding                    | GO:0005515     | 636               | 1.86                 |
| miRNA binding                      | GO:0035198     | 9                 | 1.68                 |
| Histone binding                    | GO:0042393     | 30                | 1.50                 |

**KEGG: Biological Process**

| <b>Term name</b>                                         | <b>Term ID</b> | <b># of genes</b> | <b>Log10 p-value</b> |
|----------------------------------------------------------|----------------|-------------------|----------------------|
| Spliceosome                                              | KEGG:03040     | 22                | 3.67                 |
| Signaling pathways regulating pluripotency of stem cells | KEGG:04550     | 21                | 2.67                 |
| RNA transport                                            | KEGG:03013     | 22                | 2.06                 |
| Ribosome biogenesis in eukaryotes                        | KEGG:03008     | 13                | 1.64                 |

**Reactome**

| Term name                                       | Term ID       | # of genes | Log10 p-value |
|-------------------------------------------------|---------------|------------|---------------|
| Gene expression (transcription)                 | R-MMU-74160   | 112        | 6.92          |
| Metabolism of RNA                               | R-MMU-8953854 | 72         | 6.67          |
| Processing of capped intron-containing pre-mRNA | R-MMU-72203   | 38         | 4.93          |
| RNA polymerase II transcription                 | R-MMU-73857   | 94         | 3.84          |
| mRNA splicing                                   | R-MMU-72172   | 29         | 3.04          |
| mRNA splicing - major pathway                   | R-MMU-72163   | 28         | 2.86          |
| RNA polymerase II transcribes snRNA genes       | R-MMU-6807505 | 15         | 2.34          |

### Human Phenotype Ontology

| Term name                     | Term ID    | # of genes | Log10 p-value |
|-------------------------------|------------|------------|---------------|
| Abnormal lip morphology       | HP:0000159 | 81         | 3.41          |
| Abnormal palate morphology    | HP:0000174 | 84         | 3.07          |
| Abnormality of the outer ear  | HP:0000356 | 89         | 2.93          |
| Holoprosencephaly             | HP:0001360 | 15         | 2.39          |
| Abnormal facial shape         | HP:0001999 | 80         | 1.73          |
| Anal atresia                  | HP:0002023 | 21         | 1.65          |
| Atrioventricular canal defect | HP:0006695 | 11         | 1.53          |
| Oral cleft                    | HP:0000202 | 53         | 1.42          |

### Up-regulated Genes

#### Gene Ontology: Biological Process

| Term name                                   | Term ID    | # of genes | Log10 p-value |
|---------------------------------------------|------------|------------|---------------|
| Localization                                | GO:0051179 | 529        | 9.04          |
| Transport                                   | GO:0006810 | 411        | 7.64          |
| Transmembrane transport                     | GO:0055085 | 160        | 4.75          |
| Protein phosphorylation                     | GO:0006468 | 189        | 4.25          |
| Intracellular signal transduction           | GO:0035556 | 236        | 4.11          |
| Cellular response to chemical stimulus      | GO:0070887 | 272        | 3.12          |
| Anatomical structure development            | GO:0048856 | 466        | 2.18          |
| Response to stress                          | GO:0006950 | 316        | 1.71          |
| Cell death                                  | GO:0008219 | 191        | 1.48          |
| Positive regulation of cell differentiation | GO:0045597 | 109        | 1.42          |

### Gene Ontology: Molecular Function

| Term name                    | Term ID    | # of genes | Log10 p-value |
|------------------------------|------------|------------|---------------|
| Protein binding              | GO:0005515 | 821        | 9.85          |
| TAP binding                  | GO:0046977 | 8          | 4.52          |
| GTP binding                  | GO:0005525 | 54         | 3.42          |
| Nucleotide binding           | GO:0000166 | 204        | 2.82          |
| Enzyme binding               | GO:0019899 | 207        | 1.79          |
| Beta-2-microglobulin binding | GO:0030881 | 6          | 1.78          |
| Cytoskeletal protein binding | GO:0008092 | 98         | 1.57          |
| GTPase activity              | GO:0003924 | 40         | 1.48          |
| Protein kinase binding       | GO:0019901 | 76         | 1.38          |

### Reactome

| Term name                         | Term ID       | # of genes | Log10 p-value |
|-----------------------------------|---------------|------------|---------------|
| Metabolism                        | R-MMU-1430728 | 158        | 1.78          |
| Ion channel transport             | R-MMU-983712  | 27         | 1.68          |
| Stimuli-sensing channels          | R-MMU-2672351 | 18         | 1.35          |
| Formation of xylulose-5-phosphate | R-MMU-5661270 | 4          | 1.31          |



**Table S8. Selected pathways significantly enriched among differentially expressed genes between the PAE and vehicle-treated 6N embryos 12 hr after exposure (E7.5).****Down-regulated Genes****Gene Ontology: Biological Process**

| Term name                                                 | Term ID    | # of genes | Log10 <i>p</i> -value |
|-----------------------------------------------------------|------------|------------|-----------------------|
| Positive regulation of transcription by RNA polymerase II | GO:0045944 | 37         | 5.02                  |
| Positive regulation of cellular metabolic process         | GO:0031325 | 69         | 4.56                  |
| Transcription by RNA polymerase II                        | GO:0006366 | 47         | 3.27                  |
| Regulation of cell differentiation                        | GO:0045595 | 44         | 2.61                  |
| Cell fate commitment                                      | GO:0045165 | 13         | 1.85                  |
| Skeletal system development                               | GO:0001501 | 18         | 1.72                  |
| Primary metabolic process                                 | GO:0044238 | 140        | 1.53                  |
| Embryonic morphogenesis                                   | GO:0048598 | 20         | 1.52                  |
| Generation of neurons                                     | GO:0048699 | 36         | 1.47                  |
| Regulation of nervous system development                  | GO:0051960 | 27         | 1.46                  |

**Gene Ontology: Molecular Function**

| Term name                                                         | Term ID    | # of genes | Log10 <i>p</i> -value |
|-------------------------------------------------------------------|------------|------------|-----------------------|
| Sequence-specific DNA binding                                     | GO:0043565 | 38         | 6.17                  |
| RNA polymerase II regulatory region sequence-specific DNA binding | GO:0000977 | 29         | 5.17                  |
| Transcription regulatory region DNA binding                       | GO:0044212 | 32         | 5.15                  |
| Cis-regulatory region binding                                     | GO:0035326 | 25         | 4.87                  |
| Transcription regulator activity                                  | GO:0140110 | 37         | 3.50                  |
| DNA-binding transcription activator activity                      | GO:0001216 | 17         | 2.77                  |
| DNA binding                                                       | GO:0003677 | 43         | 1.65                  |

**KEGG: Biological Process**

| Term name                    | Term ID    | # of genes | Log10 <i>p</i> -value |
|------------------------------|------------|------------|-----------------------|
| Steroid hormone biosynthesis | KEGG:00140 | 6          | 1.77                  |

**Human Phenotype Ontology**

| Term name                    | Term ID    | # of genes | Log10 <i>p</i> -value |
|------------------------------|------------|------------|-----------------------|
| Hypoplasia of the epiglottis | HP:0005349 | 3          | 1.31                  |

**Up-regulated Genes****Gene Ontology: Biological Process**

| Term name                                                              | Term ID    | # of genes | Log10 <i>p</i> -value |
|------------------------------------------------------------------------|------------|------------|-----------------------|
| Antigen processing and presentation of endogenous antigen              | GO:0019883 | 10         | 6.37                  |
| Antigen processing and presentation via MHC class Ib                   | GO:0002475 | 9          | 5.31                  |
| Antigen processing and presentation of peptide antigen                 | GO:0048002 | 10         | 4.18                  |
| Defense response                                                       | GO:0006952 | 52         | 3.78                  |
| Response to stress                                                     | GO:0006950 | 91         | 3.16                  |
| Antigen processing and presentation of peptide antigen via MHC class I | GO:0002474 | 6          | 3.07                  |
| Antigen processing and presentation                                    | GO:0019882 | 11         | 2.87                  |
| Inflammatory response                                                  | GO:0006954 | 27         | 1.90                  |

**Gene Ontology: Molecular Function**

| Term name                    | Term ID    | # of genes | Log10 <i>p</i> -value |
|------------------------------|------------|------------|-----------------------|
| TAP binding                  | GO:0046977 | 6          | 5.78                  |
| Beta-2-microglobulin binding | GO:0030881 | 6          | 5.78                  |
| Peptide antigen binding      | GO:0042605 | 6          | 4.06                  |
| Catalytic activity           | GO:0003824 | 121        | 2.68                  |
| RAGE receptor binding        | GO:0050786 | 4          | 2.64                  |

**KEGG: Biological Function**

| Term name               | Term ID    | # of genes | Log10 <i>p</i> -value |
|-------------------------|------------|------------|-----------------------|
| IL-17 signaling pathway | KEGG:04657 | 8          | 1.74                  |

**Reactome**

| Term name                                                                  | Term ID       | # of genes | Log10 <i>p</i> -value |
|----------------------------------------------------------------------------|---------------|------------|-----------------------|
| ER-phagosome pathway                                                       | R-MMU-1236974 | 8          | 4.39                  |
| Neutrophil degranulation                                                   | R-MMU-6798695 | 25         | 3.47                  |
| Endosomal/vacuolar pathway                                                 | R-MMU-1236977 | 6          | 2.66                  |
| Antigen presentation: Folding, assembly and peptide loading of class I MHC | R-MMU-983170  | 7          | 2.57                  |
| Metal sequestration by antimicrobial proteins                              | R-MMU-6799990 | 3          | 2.23                  |
| Peptide ligand-binding receptors                                           | R-MMU-375276  | 12         | 1.60                  |

### Human Phenotype Ontology

| Term name                                          | Term ID    | # of genes | Log10 <i>p</i> -value |
|----------------------------------------------------|------------|------------|-----------------------|
| Crazy paving pattern on pulmonary HRCT             | HP:0025391 | 5          | 3.27                  |
| Elevated carcinoembryonic antigen level            | HP:0031029 | 5          | 3.05                  |
| Recurrent acute respiratory tract infection        | HP:0011948 | 6          | 2.94                  |
| Acute infectious pneumonia                         | HP:0011949 | 5          | 2.48                  |
| Foam cells                                         | HP:0003651 | 5          | 2.18                  |
| Respiratory failure requiring assisted ventilation | HP:0004887 | 5          | 1.92                  |
| Abnormal blood oxygen level                        | HP:0500165 | 5          | 1.80                  |
| Hypoxemia                                          | HP:0012418 | 5          | 1.80                  |
| Abnormal blood gas level                           | HP:0012415 | 5          | 1.48                  |
| Abnormal pulmonary thoracic imaging finding        | HP:0031983 | 5          | 1.48                  |

**Table S9. Cilia-related genes significantly different between the strains at baseline or within the strains after alcohol.**

| GD7.0         |         | GD7.25          |         |                 |         | GD7.5           |         |                 |         |
|---------------|---------|-----------------|---------|-----------------|---------|-----------------|---------|-----------------|---------|
| 6J's vs. 6N's |         | 6J's            |         | 6N's            |         | 6J's            |         | 6N's            |         |
| Baseline      |         | PAE vs. Vehicle |         | PAE vs. Vehicle |         | PAE vs. Vehicle |         | PAE vs. Vehicle |         |
| Gene          | Log2 FC | Gene            | Log2 FC | Gene            | Log2 FC | Gene            | Log2 FC | Gene            | Log2 FC |
| <i>Fam65b</i> | 0.30    | <i>Fam161a</i>  | 0.86    | <i>Fam161a</i>  | 0.98    | <i>Mchr1</i>    | 1.28    | <i>Iqub</i>     | 0.95    |
| <i>Efcab7</i> | -0.89   | <i>Tbc1d30</i>  | 0.75    | <i>Tex40</i>    | 0.94    | <i>Fam161a</i>  | 1.17    | <i>Tekt1</i>    | 0.82    |
|               |         | <i>Hydin</i>    | 0.65    | <i>Hk1</i>      | 0.81    | <i>Hydin</i>    | 0.88    | <i>Tulp1</i>    | 0.80    |
|               |         | <i>Map6</i>     | 0.61    | <i>Ak1</i>      | 0.80    | <i>Rab29</i>    | 0.85    | <i>Rab29</i>    | 0.68    |
|               |         | <i>Bbs4</i>     | 0.61    | <i>Tuba4a</i>   | 0.61    | <i>Efcab7</i>   | 0.81    | <i>Tuba4a</i>   | 0.67    |
|               |         | <i>Ptch1</i>    | 0.46    | <i>Bbs4</i>     | 0.52    | <i>Tmem231</i>  | 0.81    | <i>Wdpcp</i>    | 0.62    |
|               |         | <i>Arl2bp</i>   | 0.38    | <i>Tmem17</i>   | 0.43    | <i>Mxi1</i>     | 0.80    | <i>Cep72</i>    | 0.49    |
|               |         | <i>Till1</i>    | 0.28    | <i>Haus4</i>    | 0.35    | <i>Tuba4a</i>   | 0.78    | <i>Wdr34</i>    | 0.48    |
|               |         | <i>Cnga2</i>    | 0.041   | <i>Pkhd1</i>    | 0.34    | <i>Rilpl2</i>   | 0.74    | <i>Pkd2l1</i>   | 0.33    |
|               |         | <i>Myoc</i>     | 0.02    | <i>Tekt3</i>    | 0.03    | <i>Ccno</i>     | 0.72    | <i>Ropn1</i>    | -0.06   |
|               |         | <i>Ccr6</i>     | -0.03   | <i>Till8</i>    | 0.01    | <i>Tulp1</i>    | 0.71    | <i>Iqcb1</i>    | -0.35   |
|               |         | <i>Mapre1</i>   | -0.17   | <i>Myoc</i>     | -0.06   | <i>Hspb11</i>   | 0.68    | <i>Rsg1</i>     | -0.80   |
|               |         | <i>Cct3</i>     | -0.21   | <i>Cngb3</i>    | -0.08   | <i>Rilpl1</i>   | 0.68    | <i>Gli3</i>     | -0.83   |
|               |         | <i>Exoc3</i>    | -0.23   | <i>Mapre1</i>   | -0.19   | <i>Mok</i>      | 0.60    |                 |         |
|               |         | <i>Dnaja1</i>   | -0.30   | <i>Exoc3</i>    | -0.24   | <i>Kiz</i>      | 0.56    |                 |         |
|               |         | <i>Nup35</i>    | -0.44   | <i>Hspa8</i>    | -0.36   | <i>Kif3b</i>    | 0.52    |                 |         |
|               |         | <i>Hspa8</i>    | -0.45   | <i>Ralgapa1</i> | -0.51   | <i>Mdm1</i>     | 0.51    |                 |         |
|               |         | <i>Gna11</i>    | -0.48   | <i>Trim59</i>   | -0.56   | <i>Snx10</i>    | 0.44    |                 |         |
|               |         | <i>Pard3</i>    | -0.58   | <i>Katnal1</i>  | -0.58   | <i>Pde6d</i>    | 0.44    |                 |         |
|               |         | <i>Tapt1</i>    | -0.59   | <i>Pex6</i>     | -0.74   | <i>Usp9x</i>    | 0.44    |                 |         |
|               |         | <i>Gnb1</i>     | -0.71   | <i>Wdr78</i>    | -0.78   | <i>Prkar2a</i>  | 0.43    |                 |         |
|               |         | <i>Dyx1c1</i>   | -0.72   |                 |         | <i>Ick</i>      | 0.40    |                 |         |
|               |         | <i>Atp2a2</i>   | -1.02   |                 |         | <i>Tubb2a</i>   | 0.34    |                 |         |
|               |         | <i>Prkaca</i>   | -1.19   |                 |         | <i>Unc119</i>   | 0.33    |                 |         |
|               |         | <i>Pex6</i>     | -1.38   |                 |         | <i>Rp111</i>    | 0.07    |                 |         |
|               |         |                 |         |                 |         | <i>Dpcd</i>     | -0.35   |                 |         |
|               |         |                 |         |                 |         | <i>Plk4</i>     | -0.39   |                 |         |
|               |         |                 |         |                 |         | <i>Aurka</i>    | -0.42   |                 |         |
|               |         |                 |         |                 |         | <i>Fgfr1op</i>  | -0.48   |                 |         |
|               |         |                 |         |                 |         | <i>Tmem80</i>   | -0.51   |                 |         |
|               |         |                 |         |                 |         | <i>Topors</i>   | -0.56   |                 |         |
|               |         |                 |         |                 |         | <i>Smo</i>      | -0.59   |                 |         |
|               |         |                 |         |                 |         | <i>Gli3</i>     | -0.59   |                 |         |
|               |         |                 |         |                 |         | <i>Pafah1b1</i> | -0.59   |                 |         |
|               |         |                 |         |                 |         | <i>Pifo</i>     | -0.61   |                 |         |
|               |         |                 |         |                 |         | <i>Dnajb13</i>  | -0.65   |                 |         |
|               |         |                 |         |                 |         | <i>Cspp1</i>    | -0.66   |                 |         |
|               |         |                 |         |                 |         | <i>Rttn</i>     | -0.66   |                 |         |
|               |         |                 |         |                 |         | <i>Flcn</i>     | -0.67   |                 |         |
|               |         |                 |         |                 |         | <i>Noto</i>     | -0.68   |                 |         |
|               |         |                 |         |                 |         | <i>Pkd2</i>     | -0.69   |                 |         |
|               |         |                 |         |                 |         | <i>Rab11b</i>   | -0.69   |                 |         |
|               |         |                 |         |                 |         | <i>Morn3</i>    | -0.72   |                 |         |
|               |         |                 |         |                 |         | <i>Cfap161</i>  | -0.77   |                 |         |
|               |         |                 |         |                 |         | <i>Ptch1</i>    | -0.79   |                 |         |
|               |         |                 |         |                 |         | <i>Spef2</i>    | -0.83   |                 |         |
|               |         |                 |         |                 |         | <i>Tapt1</i>    | -0.90   |                 |         |
|               |         |                 |         |                 |         | <i>Mkks</i>     | -1.03   |                 |         |
|               |         |                 |         |                 |         | <i>Osr1</i>     | -1.43   |                 |         |

**Dataset 1.** Excel file containing VST-normalized values for all replicates, group means, Log2FC, and adjusted p-values for all differentially expressed genes from each comparison.

[Click here to download Dataset1](#)
